1 **Title:**

2 **Phosphatidylserine prevents the generation of a protein-free giant plasma**  
3 **membrane domain in yeast**

4

5 **Authors:**

6 Tetsuo Mioka<sup>1\*</sup>, Guo Tian<sup>1</sup>, Wang Shiyao<sup>1</sup>, Takuma Tsuji<sup>2</sup>, Takuma Kishimoto<sup>1</sup>, Toyoshi  
7 Fujimoto<sup>2</sup>, and Kazuma Tanaka<sup>1\*</sup>

8

9 **Author affiliations:**

10 <sup>1</sup> Division of Molecular Interaction, Institute for Genetic Medicine, Hokkaido University

11 Graduate School of Life Science, Sapporo, Hokkaido, Japan

12 <sup>2</sup> Laboratory of Molecular Cell Biology, Research Institute for Diseases of Old Age, Juntendo

13 University Graduate School of Medicine, Tokyo, Japan.

14

15 \*Corresponding author: Tetsuo Mioka and Kazuma Tanaka

16 E-mail: [mioka@igm.hokudai.ac.jp](mailto:mioka@igm.hokudai.ac.jp) (TM) and [k-tanaka@igm.hokudai.ac.jp](mailto:k-tanaka@igm.hokudai.ac.jp) (KT)

17

18

19

20

## 21 **Abstract**

22 Membrane phase separation accompanied with micron-scale domains of lipids and proteins  
23 occurs in artificial membranes; however, a similar large phase separation has not been  
24 reported in the plasma membrane of the living cells. We demonstrate here that a stable  
25 micron-scale protein-free region is generated in the plasma membrane of the yeast mutants  
26 lacking phosphatidylserine. We named this region the “void zone”. Transmembrane proteins,  
27 peripheral membrane proteins, and certain phospholipids are excluded from the void zone.  
28 The void zone is rich in ergosterol and requires ergosterol and sphingolipids for its formation.  
29 These characteristics of the void zone are similar to the properties of the liquid-ordered  
30 domain caused by phase separation. We propose that phosphatidylserine prevents the  
31 formation of the void zone by preferentially interacting with ergosterol. We also found that  
32 void zones were frequently in contact with vacuoles, in which a membrane domain was also  
33 formed at the contact site.

34

35

## 36 **Introduction**

37 The fluid mosaic model describing the dynamic distribution of proteins at the plasma  
38 membrane has been largely modified and developed to date (Singer and Nicolson, 1974;  
39 Nicolson, 2014; Kusumi A *et al.*, 2012). Lateral diffusion of proteins is not free and is  
40 influenced by protein interaction with other plasma membrane proteins and cytoskeletal  
41 elements. In cholesterol-rich domains, such as lipid rafts, certain proteins can accumulate due  
42 to protein-protein or protein-lipid interactions (Lingwood and Simons, 2010). The plasma  
43 membrane is currently considered to be a nanoscale heterogeneous structure. In addition,  
44 several macroscopic diffusion barriers have been detected, and some of the barriers represent  
45 membrane compartmentalization due to interactions between the cytoskeleton and membrane

46 proteins (Kusumi *et al.*, 2012; Trimble and Grinstein, 2015). In artificial membranes, such as  
47 giant unilamellar vesicles (GUVs) and giant plasma membrane vesicles (GPMVs), membrane  
48 phase separation leads to the formation of even larger domains of proteins and lipids (Veatch  
49 and Keller, 2003; Baumgart *et al.*, 2007; Elson *et al.*, 2010; Carquin *et al.*, 2016). In phase-  
50 separated membranes, two domains coexist: a liquid-ordered phase (Lo), rich in sterols and  
51 saturated lipids, and a liquid-disordered phase (Ld), where unsaturated lipids are distributed.  
52 Phase separation in artificial membranes has been well studied and is often compared to the  
53 nanoscale membrane domains found in the cells; however, large-scale phase separation is not  
54 observed in the plasma membranes of the living cells due to unknown reasons.

55 The plasma membranes are composed of diverse lipid species, and the role of  
56 phosphatidylserine (PS) and phosphatidylinositol phosphates (PIPs) in various cellular  
57 functions has been studied (Uchida *et al.*, 2011; Cho *et al.*, 2015; Middel *et al.*, 2016;  
58 Tsuchiya *et al.*, 2018; Michell, 2008; Balla, 2013). However, it is poorly understood how  
59 individual phospholipids influence the membrane environment.

60 Although PS is essential for growth of mammalian cells, yeast mutant cells lacking *CHO1*,  
61 the only PS synthase in the budding yeast, can grow (Arikketh *et al.*, 2008; Atkinson *et al.*,  
62 1980). To explore a new role for PS, we have analysed PS-deficient *cho1Δ* yeast cells. In this  
63 study, we show that stable large protein-free membrane domains are detected in the plasma  
64 membrane of PS-deficient *cho1Δ* cells, which we named the “void zone”. Transmembrane  
65 proteins, peripheral membrane proteins, and certain phospholipids are excluded from the void  
66 zone. This property is very similar to the Lo phase in the phase-separated artificial  
67 membranes. Our results suggest that PS suppresses the development of large-scale phase  
68 separation in the plasma membrane of the living cells and consequently ensures the  
69 distribution of proteins and lipids throughout the plasma membrane. Furthermore, we found  
70 that vacuoles, the lysosomal organelle of yeast, contact with the void zone on the plasma

71 membrane.

72

## 73 **Results**

### 74 **PS-deficient cells show a protein-free region, “void zone”, in the plasma membrane.**

75 GFP-Snc1-pm, a mutant of v-SNARE Snc1, is uniformly distributed throughout the plasma  
76 membrane due to a defect in its endocytosis (Lewis *et al.* 2000). In PS-deficient *cho1Δ* cells  
77 grown at 37°C, GFP-Snc1-pm was heterogeneously distributed on the plasma membrane  
78 (Figure 1A). A GFP-Snc1-pm-deficient region was barely detectable at 30°C, was frequently  
79 present during incubation at 37°C for over 6 hours, and was not detected after heat shock at  
80 42°C for 20 min (Figure 1B). This Snc1-pm-deficient region of the plasma membrane is  
81 referred to as “void zone” in the present study. The shape of the void zone observed on the  
82 cell surface was irregular and did not correspond to a smooth circle, and some cells had  
83 multiple void zones (Figure 1C). When *cho1Δ* cells were observed immediately after staining  
84 with FM4-64 lipophilic dye, FM4-64 was distributed throughout the plasma membrane  
85 including the void zone (Figure 1D), suggesting that the plasma membrane is not lost or  
86 significantly damaged in cells harbouring the void zone. To examine whether the void zone  
87 influences the distribution of other transmembrane proteins, four different transmembrane  
88 proteins, Pma1, Pdr5, Pdr12, and Sfk1, were compared with Snc1-pm (Figure 1E). Pma1 is  
89 the major plasma membrane H<sup>+</sup>-ATPase (Serrano *et al.*, 1986). Pdr5 and Pdr12 are the ATP-  
90 binding cassette (ABC) transporters involved in the multidrug resistance and the weak organic  
91 acid resistance, respectively (Bauer *et al.*, 1999). Sfk1 regulates phospholipid asymmetry in  
92 conjunction with the flippase complex Lem3-Dnf1/2 and is involved in proper localization of  
93 a phosphatidylinositol-4-kinase Stt4 (Audhya and Emr, 2002; Mioka *et al.*, 2018). The results  
94 indicate that all these proteins showed void zones in the same region with void zones detected  
95 by Snc1-pm; the percentage of overlapping void zones was more than 82% in all cases

96 (Figure 1E; percentage was determined from 70-110 cells with void zones). These results  
97 suggest that the void zone is a membrane protein-free region common to all other membrane  
98 proteins (see below), and the void zone can represent an abnormal lipid domain that inhibits  
99 the lateral movement of the transmembrane proteins into the domain.

100 We also investigated the distribution of eisosomes, large immobile protein complexes that  
101 form furrow-like invaginations in the fungal plasma membrane (Douglas and Konopka,  
102 2014). Eisosome components, Pil1 and Sur7, were not distributed in the void zone (Figure  
103 1—figure supplement 1). The void zone was also devoid of the eisosome structure.

104 To further examine whether transmembrane proteins are completely absent in the void zone,  
105 electron microscopy combined with the freeze-fracture replica method was applied (Fujita *et*  
106 *al.*, 2010; Tsuji *et al.*, 2017). In this method, transmembrane proteins are detected as the  
107 granular structures called intramembrane particles (IMPs) (Figure 1F). In the protoplasmic  
108 face of the plasma membrane in *cho1Δ* cells, most of the regions were IMP-rich although a  
109 submicron-sized smooth region without IMPs was detectable (Figure 1G). To examine  
110 whether this IMP-deficient area is the void zone, we labelled Pma1-GFP with an anti-GFP  
111 antibody and colloidal gold-conjugated protein A (Figure 1F). As expected, only the IMP-rich  
112 area was stained for Pma1-GFP and there was no labelling in the IMP-deficient area (Figure  
113 1H). This result is consistent with the fluorescence microscopy images (Figure 1E) and  
114 indicates that the void zone corresponds to the IMP-deficient area. Thus, there are no  
115 transmembrane proteins in the void zone.

116

117 **Figure 1**

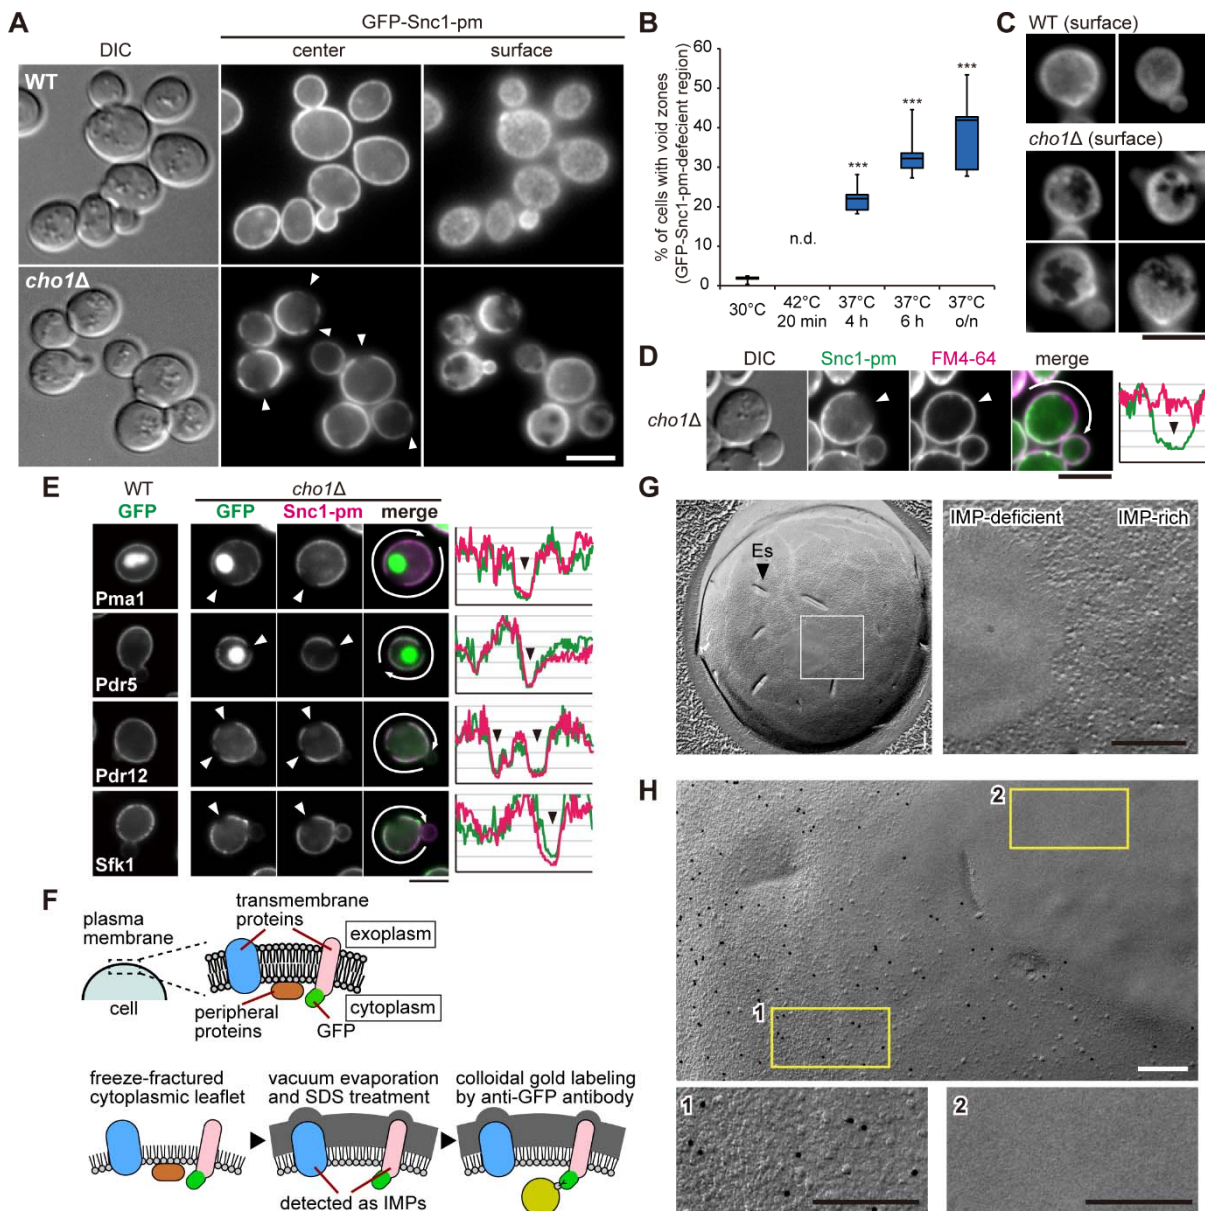

118

119 **Figure 1 A protein-free region, void zone, is present in the plasma membrane of the PS-**  
 120 **deficient yeast cells**

121 (A) Representative images of the void zone. Cells expressing GFP-Snc1-pm were grown  
 122 overnight in YPDA medium at 37°C. Arrowheads indicate the void zone. Scale bar: 5 μm. (B)  
 123 The percentage of cells with the void zone. *cho1Δ* cells expressing GFP-Snc1-pm were grown  
 124 under the indicated conditions. The incidence of the void zone was examined (n > 100 cells,  
 125 five independent experiments) and is shown as a box plot. Asterisks indicate significant

126 differences from the data obtained at 30°C according to the Tukey–Kramer test (\*\*\*,  $p <$   
127 0.001; n.d., not detected). (C) Representative images of the void zone in the cell surface. Cells  
128 were prepared as in (A). Scale bar: 5  $\mu\text{m}$ . (D) The lipophilic dye FM4-64 can be distributed in  
129 the void zone. *cho1* $\Delta$  cells were prepared as in (A) and stained with FM4-64 just before the  
130 observation. Fluorescence intensities of GFP-Snc1-pm and FM4-64 around the cell (arrows)  
131 are plotted on the right. Arrowheads indicate the void zone. Scale bar: 5  $\mu\text{m}$ . (E) The void  
132 zone is common to various transmembrane proteins. Cells expressing the indicated proteins  
133 were prepared as in (A). Arrowheads indicate the void zone. Fluorescence intensities around  
134 the cell (arrows) were plotted as in (D). Scale bar: 5  $\mu\text{m}$ . (F) A scheme of freeze-fracture  
135 replica labelling method. (G, H) Freeze-fracture EM images of the plasma membrane of  
136 *cho1* $\Delta$  cells (G) or Pma1-GFP-expressing *cho1* $\Delta$ /*P<sub>GALI</sub>-CHO1* diploid cells (H). Cells were  
137 grown at 37°C. The enlarged image of the area indicated by the square is shown on the right  
138 (G) or at the bottom (H). Colloidal gold particles indicate Pma1-GFP labelled by anti-GFP  
139 antibody (H). Scale bars: 0.2  $\mu\text{m}$ . (IMP, intramembrane particles; Es, eisosome)  
140



141 **Figure 1 S1**

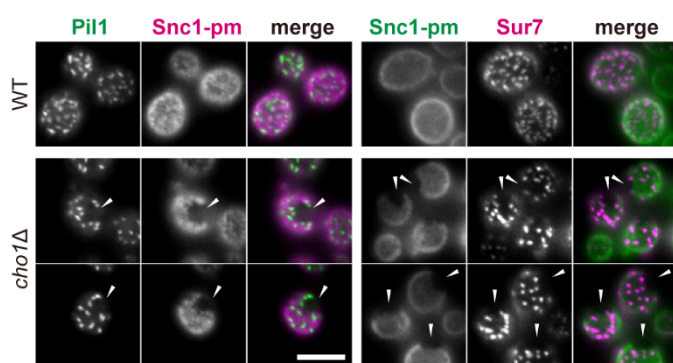

142

143 **Figure 1-Figure supplement 1. Eisosome structures are excluded from the void zone**

144 Eisosome components were not present in the void zone. Cells expressing Pil1-GFP and  
145 mRFP-Snc1-pm or GFP-Snc1-pm and Sur7-mRFP were grown in YPDA medium at 37°C.

146 Images shown are focused on the cell surface. Arrowheads indicate the void zone. Scale bar: 5  
147 μm.

148

149 **Characterization of the dynamics of the void zone.**

150 We next examined the stability of the void zone by time-lapse imaging. Most of the void  
151 zones were detected over tens of minutes, and some void zones were detectable for longer  
152 period of time over 90 min. Bud growth and cytokinesis appeared to proceed normally in the  
153 void zone-containing cells (Figure 2A). Consistently, *cho1Δ* cells showed no significant  
154 growth defects at 37°C compared to growth at 30°C (Figure 2B). These results suggest that  
155 the void zone is a very stable lipid domain, which does not influence cell cycle progression.  
156 On the other hand, the void zone was essentially undetectable in a saturated culture with high  
157 cell density and very low cell growth. Thus, we investigated whether the frequency of the  
158 void zone formation is associated with the growth phase (Figure 2C). Yeast cells show rapid  
159 growth in the presence of abundant carbon sources such as glucose. When glucose is depleted,  
160 the cells switch to a slower growth rate using ethanol as a metabolic carbon source via a  
161 diauxic shift and consequently enter the stationary phase (Gray *et al.*, 2004). As shown in



162 Figure 2C, the frequency of the void zone detection was increased early in the logarithmic  
163 growth phase and began to decrease starting from the middle phase. Remarkably, the void  
164 zone rapidly disappeared when the cells entered the diauxic shift, and no changes were  
165 observed after 12 hours, suggesting that the void zone is formed and maintained only in the  
166 presence of abundant carbon sources. To investigate the disappearance of the void zone, we  
167 examined whether certain stresses induce the disappearance. *choI*Δ cells grown at 37°C were  
168 incubated for additional 3 h at 37°C under three stress conditions, including ATP depletion,  
169 glucose starvation, and translation inhibition; then, the cell numbers and the frequency of the  
170 void zone were measured. Cell growth was almost completely blocked by all these stresses,  
171 and the frequency of the void zone detection was significantly reduced by ATP depletion and  
172 glucose starvation, but not by translation inhibition (Figure 2D). These results suggest that the  
173 maintenance of the void zone is energy-dependent and does not necessarily require cell  
174 growth.

175 We also noticed that the void zone tends to occur in the mother cells rather than the daughter  
176 cells (Figure 2E). To confirm this, the distribution of the void zone was categorized into the  
177 following groups; cells with no bud or small bud (type 1), cells with mid-large bud in which  
178 the void zone occurs only in the mother cell (type 2), and cells in which the void zone occurs  
179 in the mother and daughter cells (type 3). As a result, almost all void zones appeared only in  
180 the mother cells before or during budding (type 1 and 2); very few type 3 cells were detected,  
181 and no cells with void zones formed only in the daughter cells were observed (Figure 2E).  
182 This biased distribution was observed even under the condition of OD<sub>600</sub> = 4.0-6.0, which  
183 shows high frequency of the void zone. Exocytosis and endocytosis frequently occur in a bud,  
184 which is a polarized growth site, compared to a mother cell. These results suggest that the  
185 void zone is generated in a more static membrane.

186

187 **Figure 2**

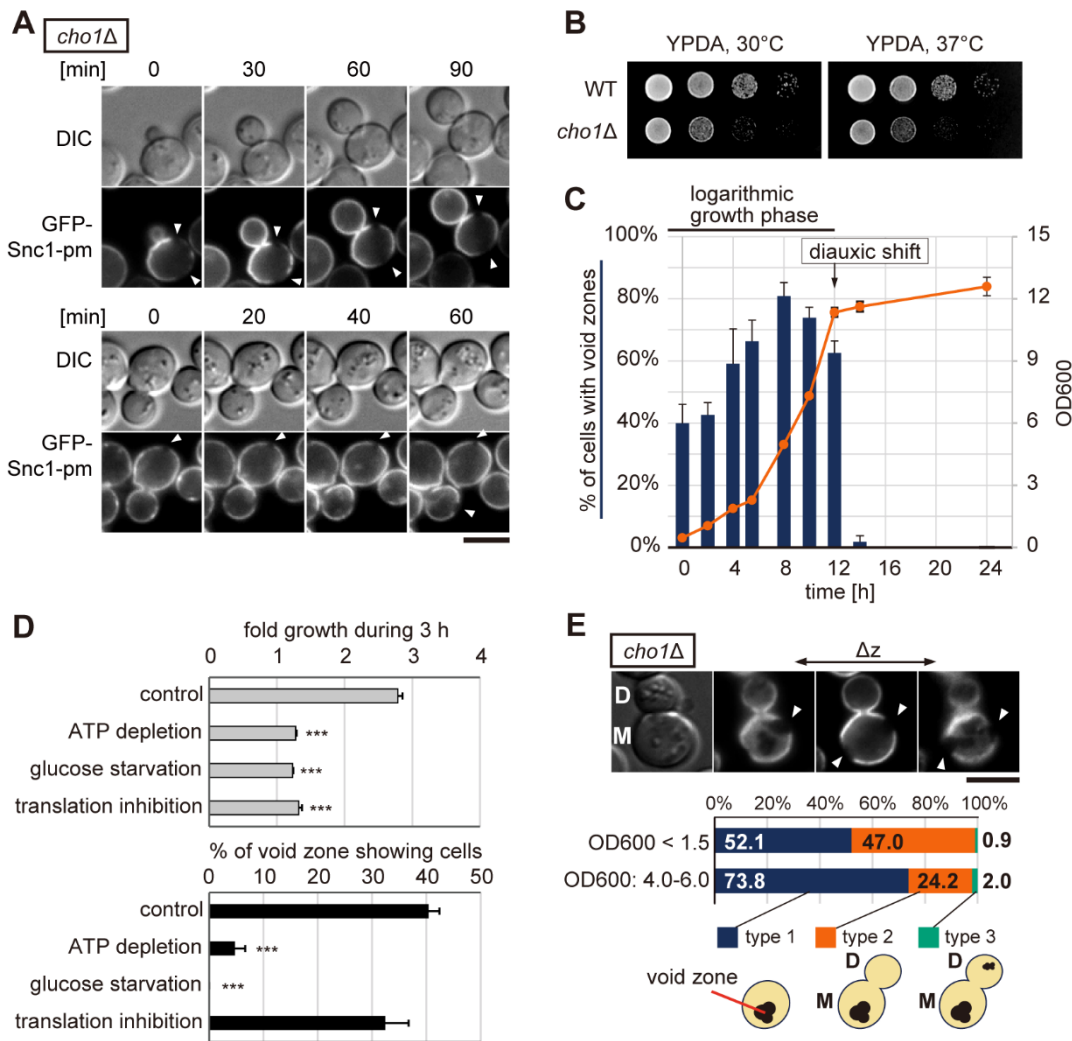

188

189 **Figure 2 The void zone is stably maintained in an energy-dependent manner**

190 (A) Time-lapse imaging of the void zone. *cho1Δ* cells expressing GFP-Snc1-pm were grown

191 in YPDA medium at 37°C. Two representative examples are shown; a cell with a growing

192 bud (upper panels) and a dividing cell (lower panels) with the void zones. Arrowheads

193 indicate the void zone. Scale bar: 5 μm. (B) Normal growth of *cho1Δ* cells at 37°C. Serial

194 dilutions of cultures were spotted onto the YPDA plates followed by incubation at 30°C or

195 37°C for 1 d. (C) Frequency of the void zone generation at various growth stages. *cho1Δ* cells

196 expressing GFP-Snc1-pm were grown in YPDA at 37°C, and the percentage of the cells with

197 void zones (blue bars) and the OD<sub>600</sub> (orange line) were determined. Data of three

198 independent experiments (n > 100 cells each) are shown as the mean and SD. (D)

199 Disappearance of the void zone under stress conditions. *cho1Δ* cells expressing GFP-Snc1-pm  
200 were grown to the early log phase at 37°C and were shifted to YPDA medium containing 20  
201 mM sodium azide (ATP depletion), YPA medium lacking glucose (glucose starvation), and  
202 YPDA medium containing 10 μg/ml cycloheximide (translation inhibition). After incubation  
203 for 3 h at 37°C, OD<sub>600</sub> and the incidence of the void zone (n > 100 cells) were determined.  
204 Data of three independent experiments are shown as the mean and SD. Asterisks indicate  
205 significant differences determined by the Tukey–Kramer test (\*\*\*, p < 0.001). (E) Biased  
206 formation of the void zone in the mother cell. *cho1Δ* cells expressing GFP-Snc1-pm were  
207 prepared as in (A). A representative pattern of the void zone taken on the different Z focal  
208 planes is shown in the upper panel; the void zone occurs in the mother cell (M) but not in the  
209 daughter cell (D). Arrowheads indicate the void zone. Scale bar: 5 μm. The percentage of the  
210 cells with the void zone in the indicated pattern types (n > 200 cells each) is shown in the  
211 lower panel.

212

### 213 **Void zone formation is specific to PS-depletion and is a reversible process.**

214 To examine whether the void zone can be detected in the lipid mutants other than *cho1Δ*, we  
215 investigated the mutants of the genes involved in the synthesis of phosphatidylethanolamine  
216 (PE) and phosphatidylcholine (PC). In PE-, and PC-deficient cells, GFP-Snc1-pm was evenly  
217 distributed in the plasma membrane, and the void zone was not detected (Figure 3A). We next  
218 examined whether the recovery of PS levels dissipates the void zone by adding lyso-PS to the  
219 culture media. Incorporated lyso-PS is rapidly converted to PS in the endoplasmic reticulum  
220 (ER) via a *CHO1*-independent pathway (Fairn *et al.*, 2011; Maeda *et al.*, 2013). The recovery  
221 of PS was verified by expressing a PS-specific biosensor Lact-C2 (Yeung *et al.*, 2008). In  
222 *cho1Δ* cells without lyso-PS, the frequency of the void zone did not change for 60 min and  
223 mRFP-Lact-C2 remained diffuse in the cytosol. On the other hand, the addition of lyso-PS

224 significantly reduced the incidence of the void zone and resulted in the localization of mRFP-  
225 Lact-C2 to the plasma membrane (Figure 3B). These results indicate that the void zone  
226 formation is a reversible process. After the addition of lyso-PS, void zones did not disappear  
227 uniformly, but rather appeared to be gradually repaired from the boundaries (Figure 3C). In  
228 some *choI* $\Delta$  cells, mRFP-Lact-C2 was distributed outside of the void zone (Figure 3D). This  
229 void zone is gradually repaired by PS around the void zone. Our results suggest that the void  
230 zone is a lipid domain that consists of a lipid (lipids), and random distribution of these lipids  
231 in the plasma membrane is facilitated by interaction with PS.  
232

233 **Figure 3**

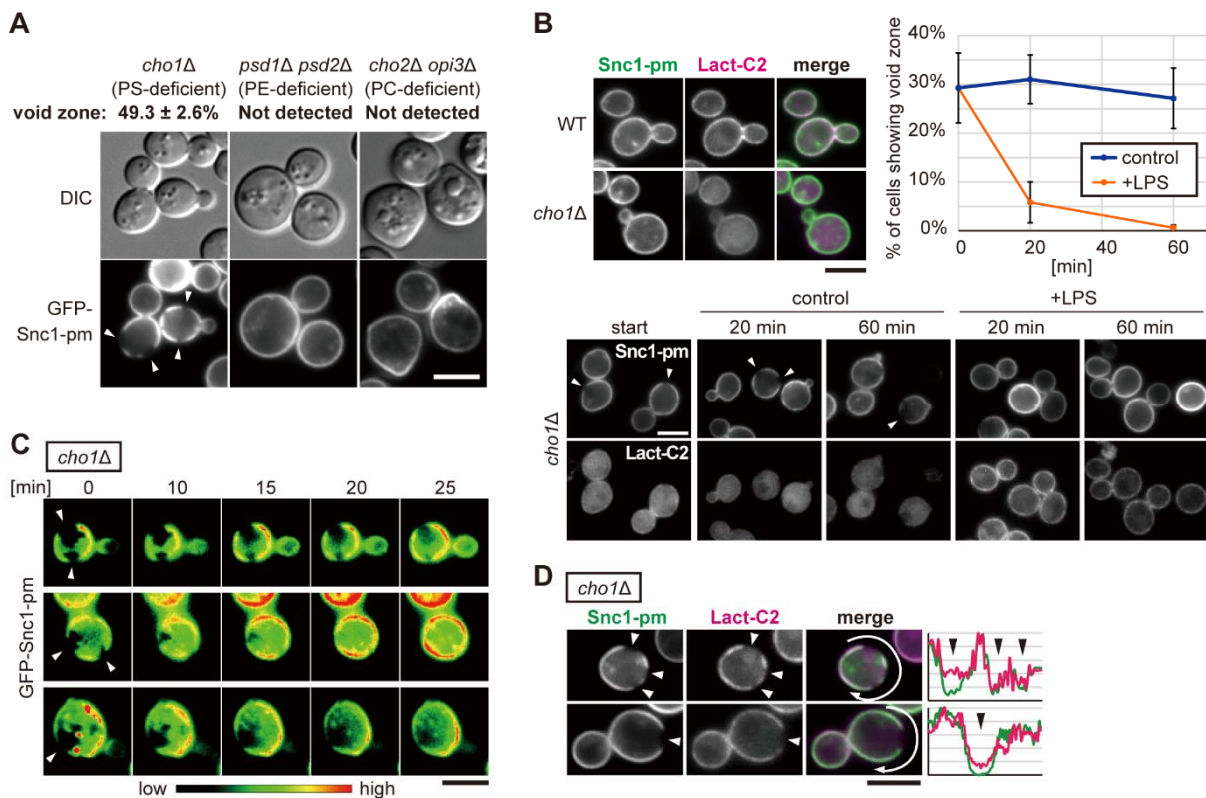

234

235 **Figure 3 Void zone formation is specific to PS depletion and is a reversible process.**

236 (A) The generation of the void zone is specific to the PS-deficient cells. All strains expressing  
 237 GFP-Snc1-pm were grown at 37°C. *cho1Δ* cells were grown in SD medium containing 1 mM  
 238 ethanolamine. *psd1Δ psd2Δ* cells were grown in SD medium containing 2 mM choline. *cho2Δ*  
 239 *opi3Δ* cells were grown in SD medium. Percentage of the cells with the void zone is indicated  
 240 as the mean and SD (n > 100 cells, three independent experiments). Arrowheads indicate the  
 241 void zone. Scale bar: 5 μm. (B) Regeneration of PS by lyso-PS supplementation dissipates the  
 242 void zone. Wild-type and *cho1Δ* cells expressing GFP-Snc1-pm and mRFP-Lact-C2 are  
 243 shown in the upper left panel. *cho1Δ* cells were grown in YPDA medium at 37°C in the  
 244 presence or absence of lyso-PS (20 μM). Percentage of the cells with the void zone was  
 245 examined at 20 and 60 min and shown as the mean and SD (n > 100 cells, three independent  
 246 experiments) (upper right panel). Representative images are shown in the lower panel.  
 247 Arrowheads indicate the void zone. Scale bars: 5 μm. (C) Time-lapse imaging of the void

248 zone disappearance induced by lyso-PS addition. *cho1Δ* cells expressing GFP-Snc1-pm were  
249 prepared as in (B). Cell suspension was placed on the agarose gel pad immediately after  
250 mixing with lyso-PS and time-lapse imaging was started. Three examples are shown in the  
251 pseudo-colour. Arrowheads indicate the void zone. Scale bar: 5 μm. (D) Void zones are not  
252 rapidly dissipated by PS. *cho1Δ* cells expressing GFP-Snc1-pm and mRFP-Lact-C2 were  
253 prepared as in (B). Images 20 min after supplementation with lyso-PS are shown.  
254 Fluorescence intensities of GFP and mRFP in the cell periphery (arrows) are plotted on the  
255 right. Arrowheads indicate the void zone. Scale bar: 5 μm.

256

257 **Void zone restricts lateral diffusion of the inner leaflet-anchored proteins, but has no**  
258 **effect on a GPI-anchored protein.**

259 We next examined whether the plasma membrane-localized peripheral membrane proteins  
260 can be distributed in the void zone. Three types of proteins were tested (Figure 4A). Ras2 is a  
261 small GTPase with the C-terminal lipid moiety inserted into the cytoplasmic leaflet of the  
262 plasma membrane. Ras2 undergoes farnesylation and palmitoylation, and the latter is required  
263 for membrane localization (Bhattacharya *et al.*, 1995). Gap1C is the C-terminal cytosolic  
264 region of the amino acid permease Gap1. Gap1 localizes to the plasma membrane, and Gap1C  
265 without the transmembrane domain is also localized at the plasma membrane (Popov-  
266 Čeleketić *et al.*, 2016). Gap1C is palmitoylated; however, its membrane localization is due to  
267 its amphipathic helix structure and not to the palmitoyl anchor (Popov-Čeleketić *et al.*, 2016).  
268 Gas1 is a cell wall protein with glycosylphosphatidylinositol (GPI)-anchor inserted into the  
269 extracellular leaflet of the plasma membrane (Nuoffer *et al.*, 1991). All these proteins were  
270 mainly localized to the plasma membrane in the wild-type cells (Figure 4B). In *cho1Δ* cells  
271 harbouring the void zone, Ras2 and Gap1C were absent from the void zone similar to Snc1-  
272 pm (Figure 4B). In contrast, Gas1 was uniformly distributed in the plasma membrane

273 regardless of the void zone (Figure 4B). These results suggest that the void zone restricts the  
 274 lateral diffusion of the inner leaflet-associated proteins and the transmembrane proteins but  
 275 does not influence the diffusion of proteins anchored to the outer leaflet. Normally, PS is  
 276 abundantly distributed in the inner leaflet of the plasma membrane. These results suggest that  
 277 formation of the void zone is mainly due to lipid changes in the inner leaflet rather than that in  
 278 the outer leaflet.

279

280 **Figure 4**

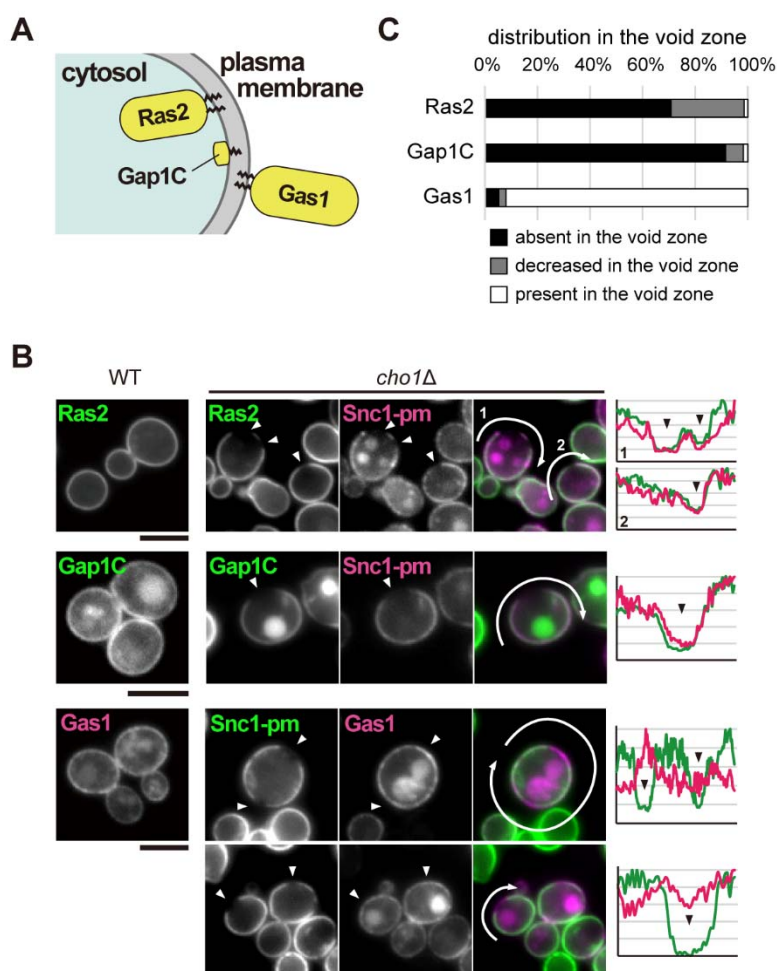

281

282 **Figure 4 Distribution of peripheral membrane proteins in the void zone.**

283 (A) Localization of three peripheral membrane proteins. (B) Ras2 and Gap1C were excluded  
 284 from the void zone, but Gas1, a GPI-AP, was not excluded. Cells expressing GFP-Ras2 under



285 the control of the *GALI* promoter and mRFP-Snc1-pm were grown in YPGA at 37°C. Cells  
286 expressing GFP-Gap1C and mRFP-Snc1-pm or GFP-Snc1-pm and mRFP-Gas1 were grown  
287 in SDA-U medium containing 1 mM ethanolamine at 37°C. Fluorescence intensities of GFP  
288 and mRFP in the cell periphery (arrows) are plotted on the right. Arrowheads indicate the  
289 void zone. Scale bars: 5  $\mu$ m. (C) Cells observed as in (B) are categorized by the distribution of  
290 each protein in the void zones detected by Snc1-pm (n > 50 cells with the void zone).

291

292 **Void zone is a liquid-ordered-like domain that requires ergosterol and sphingolipid for**  
293 **its formation.**

294 Based on the fact that transmembrane proteins are excluded from the void zone, we  
295 hypothesized that the void zone is a liquid-ordered (Lo) domain formed by phase separation.  
296 When phase separation occurs in an artificial membrane containing saturated phospholipids  
297 (e.g., dipalmitoylphosphatidylcholine (DPPC) and sphingolipids), unsaturated phospholipids  
298 (e.g., dioleoylphosphatidylcholine (DOPC)), and cholesterol, cholesterol and saturated  
299 phospholipids form the Lo domains and unsaturated lipids are separated into the liquid-  
300 disordered (Ld) domains (Baumgart *et al.*, 2003; Baumgart *et al.*, 2007; Risselada and  
301 Marrink, 2008; Lingwood and Simons, 2010). Cholesterol preferentially interacts with lipids  
302 containing saturated acyl chains. Relative difference between affinities of cholesterol for  
303 unsaturated versus saturated phospholipids was suggested as one of the causes of phase  
304 separation (Engberg *et al.*, 2016). Importantly, molecular dynamics computer simulation, the  
305 giant unilamellar vesicle (GUV) assay, and giant plasma membrane vesicle (GPMV) assay  
306 have shown that transmembrane helices and transmembrane proteins are excluded from the  
307 Lo domains and segregated into the Ld domains (Sengupta *et al.*, 2008; Schäfer *et al.*, 2011).  
308 In addition, phase separation into the Lo and Ld phases occurs with yeast lipids in GUVs  
309 (Klose *et al.*, 2010). Therefore, we examined whether the void zone is a sterol-enriched lipid

310 domain. To assess the distribution of ergosterol, a major sterol in yeast, cells were stained  
311 with the sterol-binding dye filipin. Filipin showed a punctate distribution in the plasma  
312 membrane of the wild-type cells as reported previously (Grossmann *et al.*, 2007), whereas in  
313 *cho1Δ* cells, filipin mainly accumulated at the void zones (Figure 5A), indicating that the void  
314 zone is rich in ergosterol.

315 Similar to sterols, sphingolipids are important for the formation of the Lo domains (Dietrich  
316 *et al.*, 2001; Baumgart *et al.*, 2003; de Almeida *et al.*, 2003; Veatch and Keller, 2003). We  
317 therefore examined whether the biosynthesis of ergosterol and sphingolipid is required for the  
318 formation of the void zone. Erg2, Erg3, and Erg4 are essential enzymes for the synthesis of  
319 ergosterol (Silve *et al.*, 1996; Arthington *et al.*, 1991; Lai *et al.*, 1994). Ipt1 is an  
320 inositolphosphotransferase required for the synthesis of mannosyl-  
321 diinositolphosphorylceramide (M(IP)2C), the most abundant sphingolipid in yeast (Dickson *et*  
322 *al.*, 1997). Elo2 and Elo3, fatty acid elongases, participate in the long chain fatty acid  
323 biosynthesis of sphingolipids (Oh *et al.*, 1997). Sur2 and Scs7 are hydroxylases involved in  
324 the hydroxylation of sphingolipids (Haak *et al.*, 1997). Disruption of any of these genes  
325 essentially abolished the formation of the void zone (Figure 5B). Consistently, an inhibitor of  
326 ergosterol synthesis, fluconazole, blocked the formation of the void zone (Figure 5C). These  
327 results indicate that ergosterol and sphingolipids are necessary for the formation of the void  
328 zone and suggest that the void zone may be a Lo-like domain composed of abundant  
329 ergosterol and sphingolipids.

330 We further investigated whether the formation of the void zone results from an increase in  
331 the ergosterol level. The ergosterol level was increased in the *cho1Δ* cells grown at 37°C  
332 compared to that in the wild-type cells grown at 30°C. However, a similar increase in the  
333 ergosterol level was observed in the wild-type cells grown at 37°C and *cho1Δ* cells grown at

334 30°C, in which the void zone was not formed (Figure 5D). Therefore, the generation of the  
335 void zone is not closely correlated with an increase in ergosterol.

336 The finding that the void zone is an ergosterol-rich lipid domain prompted us to investigate  
337 the distribution of other lipids that can be visualized using the corresponding probes. To  
338 examine the distribution of phosphatidylinositol 4-phosphate (PI(4)P), phosphatidylinositol  
339 4,5-bisphosphate (PI(4,5)P<sub>2</sub>), and phosphatidic acid (PA), the PH domains of yeast Osh2 and  
340 human PLC $\delta$  and the PA-binding domain of yeast Spo20 were used as the probes,  
341 respectively (Roy and Levine, 2004; Lemmon *et al.*, 1995; Watt *et al.*, 2002; Nakanishi *et al.*,  
342 2004). These probes were uniformly distributed in the plasma membrane in the wild-type  
343 cells; however, none of the probes were detected in the void zone (Figure 5E). This result  
344 suggests that PI(4)P, PI(4,5)P<sub>2</sub>, and PA cannot enter the void zone by lateral diffusion. The  
345 majority of yeast phospholipids have mono- or di-unsaturated fatty acids (Schneiter *et al.*,  
346 1999; Ejsing *et al.*, 2009; Klose *et al.*, 2012); hence, these results support the possibility that  
347 the void zone corresponds with the Lo-domains.

348 We conclude that the void zone is a lipid domain with an unusual assembly of ergosterol that  
349 cooperates with sphingolipids and thereby has Lo domain-like properties with limited lateral  
350 diffusion of the peripheral membrane proteins and certain types of glycerophospholipids.

351

352 **Figure 5**

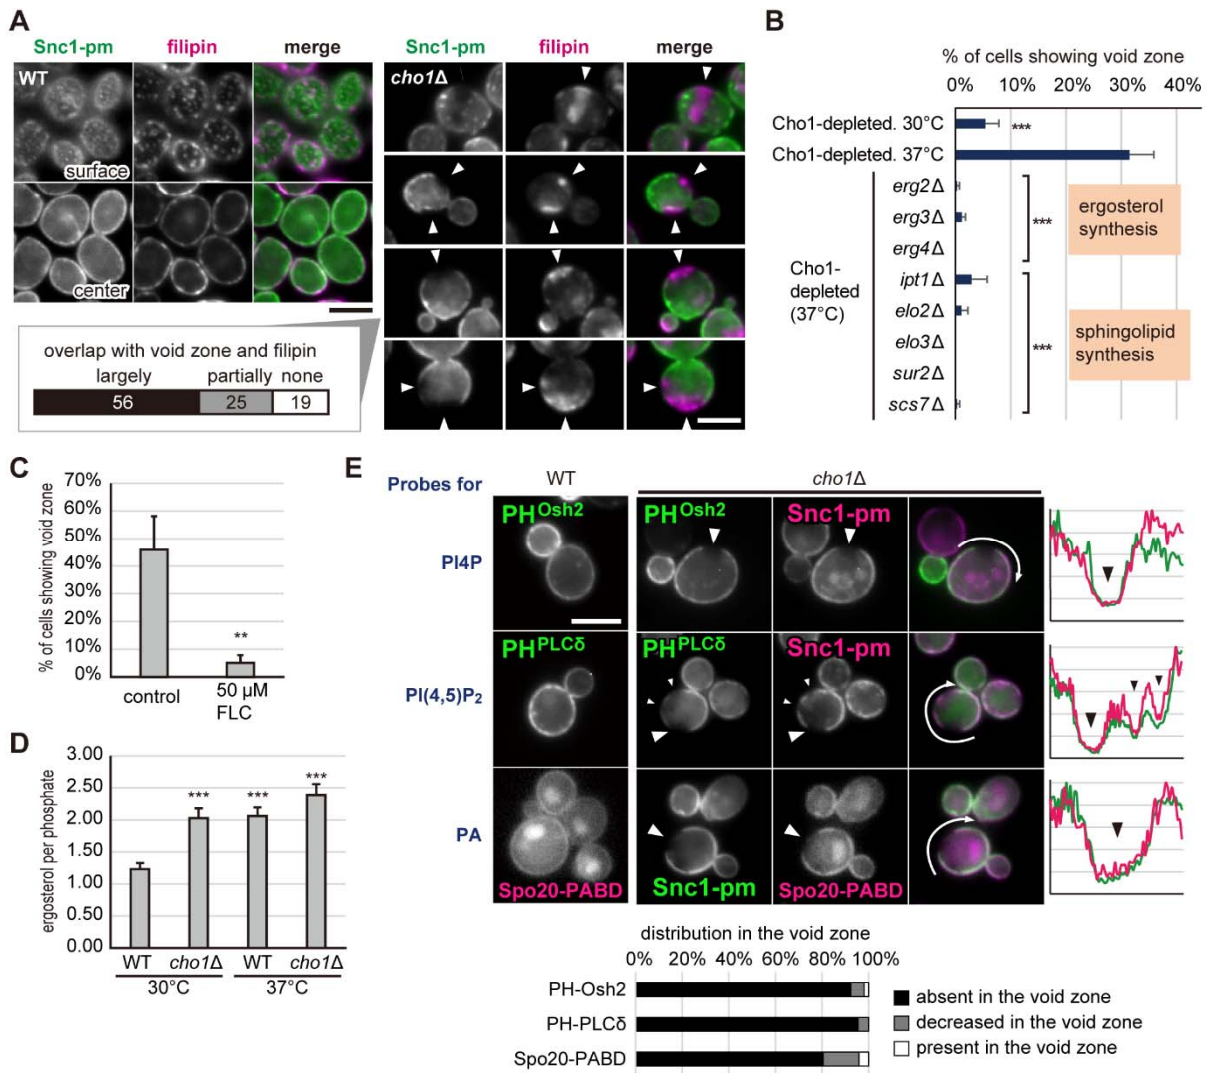

353

354 **Figure 5 Ergosterol is accumulated in the void zone.**

355 (A) Ergosterol accumulation in the void zone. Cells expressing GFP-Snc1-pm were grown in  
 356 YPDA medium at 37°C, fixed, and stained with filipin. The filipin staining patterns of *cho1Δ*  
 357 cells containing the void zone (n = 100) were categorized and are shown in the lower left  
 358 panel. Arrowheads indicate the void zone. Scale bars: 5 μm. (B) The formation of the void  
 359 zone was dependent on ergosterol and sphingolipids. Cells expressing GFP-Snc1-pm were  
 360 grown overnight in YPDA medium at the indicated temperature. The incidence of the void  
 361 zone (n > 100 cells) was examined in three independent experiments, and the data are shown  
 362 as the mean and SD. Asterisks indicate significant differences from the Cho1-depleted cells

363 grown at 37°C according to the Tukey–Kramer test (\*\*\*,  $p < 0.001$ ). (C) The void zone was  
364 not generated after ergosterol depletion by fluconazole. *cho1Δ* cells expressing GFP-Snc1-pm  
365 were precultured in YPDA medium at 30°C and incubated at 37°C for 6 h with or without 50  
366 μM fluconazole. The incidence of the void zone ( $n > 100$  cells) was examined and the data are  
367 shown as in (B). Asterisks indicate a significant difference according to the Student’s t-test  
368 (\*\*,  $p < 0.005$ ). (D) The total levels of ergosterol in the wild-type and *cho1Δ* cells. Cells were  
369 grown overnight in YPDA medium at 30°C or 37°C, and total cellular lipids were extracted.  
370 Ergosterol contents were analysed by TLC. The ratio of total ergosterol to total phosphate  
371 (mol/mol) is shown as the mean and SD of four independent experiments. Asterisks indicate  
372 significant differences according to the Tukey–Kramer test (\*\*\*,  $p < 0.001$  compared to the  
373 wild-type at 30°C). (E) PIPs and PA were excluded from the void zone. Cells expressing  
374 mRFP-Snc1-pm and either Osh2-2xPH-3xGFP or GFP-PLCδ-2XPH were grown and  
375 observed as in (B). Cells expressing GFP-Snc1-pm and mCherry-Spo20-PABD were grown  
376 in SDA-U medium containing 1 mM ethanolamine at 37°C. Fluorescence intensities of GFP  
377 and either mRFP or mCherry around the cells (arrows) are plotted on the right. Arrowheads  
378 indicate the void zone. Scale bar: 5 μm. The distribution of each probe in the void zones  
379 detected by Snc1-pm ( $n > 50$  cells with the void zone) is shown in the lower panel.

380

### 381 **Vacuole, a lysosome-like organelle in yeast, contacts the void zone**

382 Observations using the lipid probes suggest phase separation in the plasma membrane; the  
383 lipid composition of the void zone is different from that in the other plasma membrane  
384 regions. The plasma membrane and the ER form the membrane contact sites (MCSs) via ER-  
385 resident tethering proteins that interact with phospholipids of the plasma membrane (Saheki  
386 and De Camilli, 2017). To test whether the void zone can influence this ER-PM contact, we  
387 examined two ER marker proteins, Hmg1 and Rtn1 (Koning *et al.*, 1996; De Craene *et al.*,

388 2006). The cortical ER (cER) was clearly absent at the void zone in the *cho1Δ* cells (Figure  
389 6A; 89.2% of Hmg1, 92.9% of Rtn1,  $n > 100$  cells, respectively). The ER-PM tethering  
390 proteins Tcb1/2/3, and Ist2 were reported to bind to PS and PI(4,5)P2, respectively (Schulz  
391 and Creutz, 2004; Fischer *et al.*, 2009). Since PS is not synthesized in the *cho1Δ* cells and  
392 PI(4,5)P2 is not distributed in the void zone (Figure 5E), the association of cER with the  
393 plasma membrane may be lost in the void zone.

394 To investigate whether the void zone influences the distribution or morphology of other  
395 organelles, several organelle markers were examined in the *cho1Δ* cells. Surprisingly, we  
396 found that vacuoles were in contact with the void zones (Figure 6B). The observations using  
397 Snc1-pm and FM4-64 indicate that the contact between the void zone and the vacuole was  
398 detected in 45.1% of the *cho1Δ* cells with the void zone ( $45.1 \pm 7.0\%$ , five independent  
399 experiments,  $n > 50$  cells each). The proximity of the non-void zone regions and vacuoles was  
400 observed only in 7.8% of the *cho1Δ* cells ( $7.8 \pm 1.7\%$ , three independent experiments,  $n > 100$   
401 cells each) compared to that in the wild-type cells ( $10.1 \pm 2.1\%$ , three independent  
402 experiments,  $n > 100$  cells each). These data suggest that frequent contact of the vacuoles  
403 with the plasma membrane is specific to the void zone. The fact that not all void zones are in  
404 contact with the vacuoles indicates that the exclusion of the transmembrane proteins from the  
405 void zones was not caused by the vacuole contact (Figure 6B). On the other hand, the *trans*-  
406 Golgi network (TGN), lipid droplets, and mitochondria did not contact the void zone (Figure  
407 6—figure supplement 1), suggesting that only vacuoles interact with the void zone. This type  
408 of contact between the plasma membrane and the vacuoles or lysosomes has not been  
409 reported, and we refer to the contact between the void zone and vacuoles as the "V-V  
410 contact".

411 In stationary phase yeast cells, a raft-like domain is formed in the vacuolar membrane, where  
412 lipophagy, the uptake of the lipid droplets, occurs (Toulmay and Prinz, 2013; Wang *et al.*,

413 2014; Tsuji *et al.*, 2017). The properties of this vacuolar microdomain are very similar to the  
414 properties of the void zone, including absence of the transmembrane proteins and ergosterol  
415 enrichment. To test whether this vacuolar microdomain is present in the void zone contact  
416 area, we examined three vacuolar transmembrane proteins, Vph1, Cot1, and Zrc1 (Manolson  
417 *et al.*, 1992; Li and Kaplan, 1998). These proteins were uniformly distributed in the vacuolar  
418 membrane of the wild-type cells; however, in some vacuoles in contact with the void zone of  
419 the *cho1Δ* cells, these proteins were excluded from the contact area (Figure 6C). One of these  
420 proteins, Vph1, had the highest frequency of segregation on vacuoles in contact with the void  
421 zone (73.5% of Vph1, 41.5% of Cot1, and 30.0% of Zrc1,  $n > 50$ ). In contrast, the exclusion  
422 of FM4-64 dye in vacuoles of the cells with the V-V contacts was not detected ( $n > 50$ ; Figure  
423 6B). These data suggest that certain vacuoles form a membrane domain at the V-V contact  
424 site.

425 To understand the dynamics of the V-V contact, we used time-lapse imaging with GFP-  
426 Snc1-pm and Vph1-mRFP (Video 1) and detected two patterns. First, the movement of a  
427 vacuole into the void zone was observed (Figure 6D, shown as "a"). The speed of the vacuole  
428 migration to the void zone was highly variable between individual cells. However, some void  
429 zones had no contact with the vacuoles during the 1 h observation. Second, the V-V contact  
430 lasted over half an hour (Figure 6D, shown as "b"). In one hour of observation of the cells  
431 with the void zone, 60% of the cells had the V-V contact over 30 min (Figure 6E). The  
432 disappearance of the void zone after its formation was rarely observed, and this phenomenon  
433 appears to be unrelated to the presence or absence of the V-V contacts. In addition, no  
434 vacuoles left the void zone while the void zone was maintained. The molecular basis of the V-  
435 V contact is unknown although this contact appears to be stable. Vacuoles in contact with the  
436 void zone underwent fission and fusion (Figure 6—figure supplement 2).

437



438 **Figure 6**

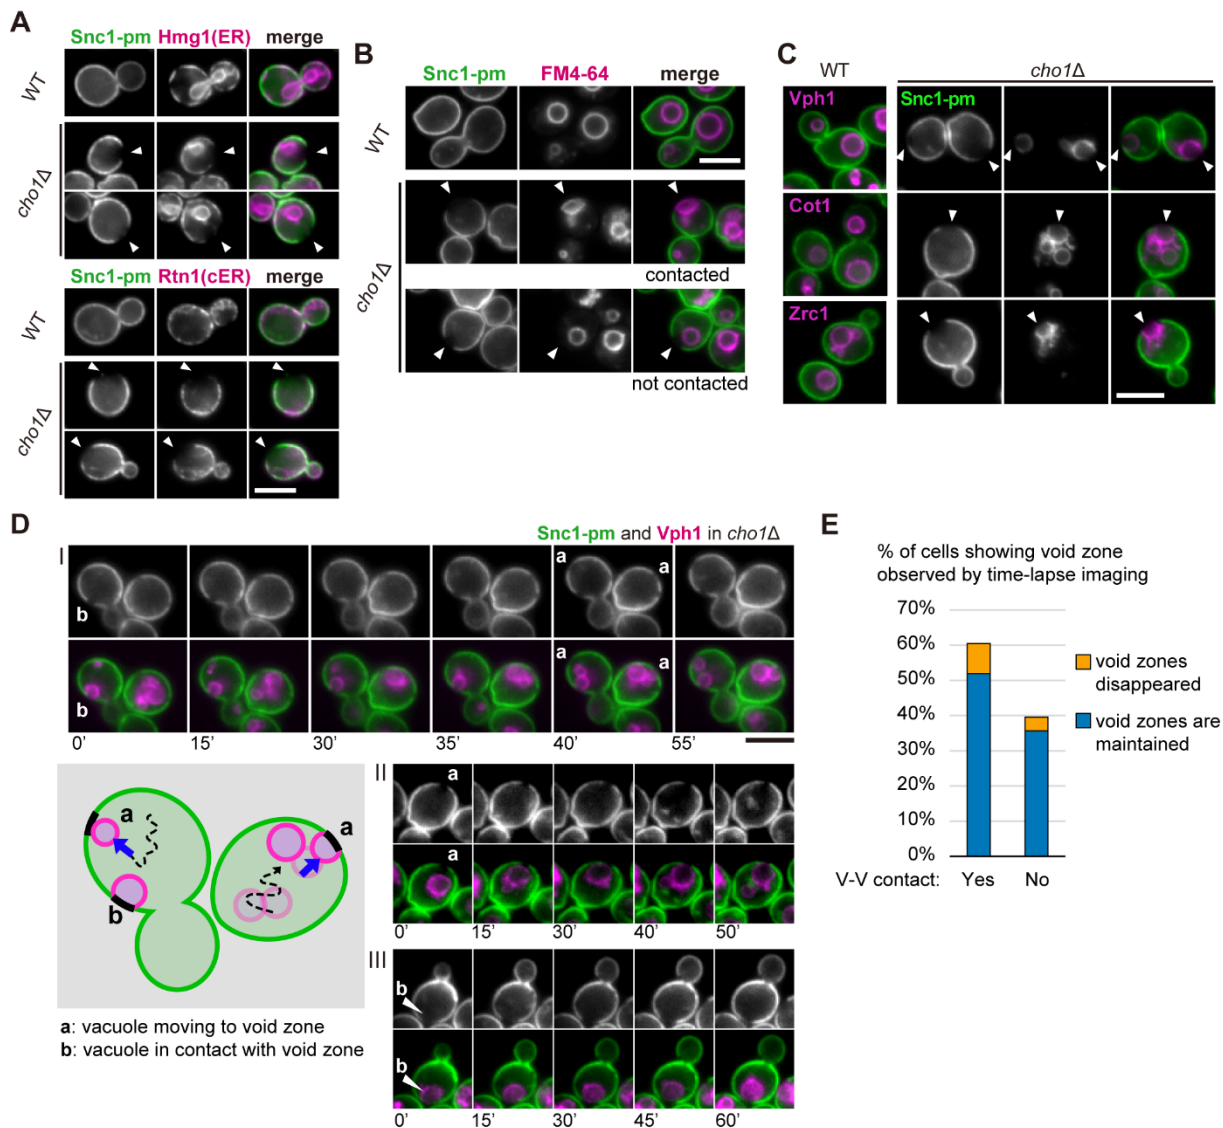

439

440 **Figure 6 Vacuoles contact the void zone.**

441 (A) Cortical ER is disassociated from the void zone. Cells expressing mRFP-Snc1-pm and  
 442 either Hmg1-GFP or Rtn1-GFP were grown in YPDA medium at 37°C. The mRFP-Snc1-pm  
 443 and ER marker proteins are shown in green and magenta, respectively. Arrowheads indicate  
 444 the void zone. Scale bar: 5 μm. (B) Vacuoles contact the void zone. Cells expressing GFP-  
 445 Snc1-pm were grown in YPDA medium at 37°C and stained with FM4-64 for 20 min.  
 446 Arrowheads indicate the void zone. Scale bar: 5 μm. (C) Separation of the vacuolar protein in  
 447 the void zone contact region. Cells expressing mRFP-Snc1-pm and either Vph1-GFP or GFP-

448 Cot1 and cells expressing GFP-Snc1-pm and mRFP-Zrc1 were grown in YPDA medium at  
449 37°C. Snc1-pm and vacuolar proteins are shown in green and magenta, respectively.  
450 Arrowheads indicate the void zone. Scale bar: 5  $\mu$ m. (D) Time-lapse imaging of the vacuole-  
451 void zone contact. *cho1* $\Delta$  cells expressing GFP-Snc1-pm and Vph1-mRFP were grown in  
452 YPDA medium at 37°C. Three examples with two distinctive patterns (a, b) are shown. In the  
453 bottom left scheme, black regions in the plasma membrane indicate the void zone. Numbers  
454 indicate time in min. Scale bar: 5  $\mu$ m. (E) The vacuole-void zone contact is stable. Cells  
455 observed by time-lapse imaging as in (D) are categorized by the presence or absence of the V-  
456 V contact and the void zone behaviour ( $n > 100$  cells with the void zone). Estimation was  
457 based on the void zone or the V-V contact lasting more than 30 min during 1 h observation.  
458

459 **Figure 6 S1**

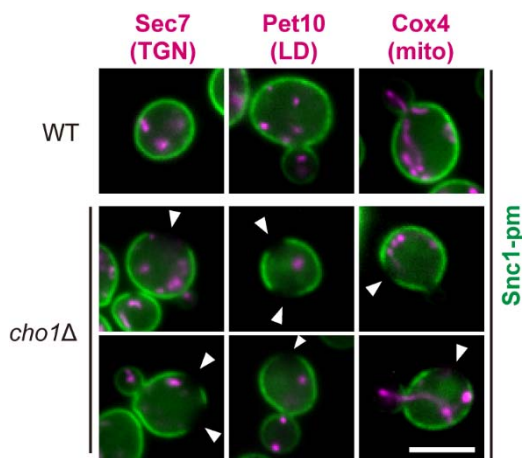

460

461 **Figure 6-Figure supplement 1 Distribution of organelles in the cells with the void zone.**

462 The distribution of the *trans*-Golgi network (TGN), lipid droplets (LD), and mitochondria  
463 (mito) is not influenced by the void zone. Cells expressing GFP-Snc1-pm and Sec7-mRFP,  
464 Pet10-GFP and mRFP-Snc1-pm, or Cox4-GFP and mRFP-Snc1-pm were grown in YPDA or  
465 SDA-U media at 37°C. Snc1-pm and the organelle marker proteins are shown in green and  
466 magenta, respectively. Arrowheads indicate the void zone. Scale bar: 5  $\mu$ m.

467

468 **Figure 6 S2**

**Snc1-pm** and **Vph1** in *cho1Δ*

fusion of vacuoles in contact with the void zone

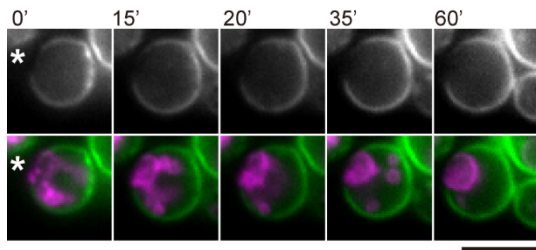

fission of vacuoles in contact with the void zone

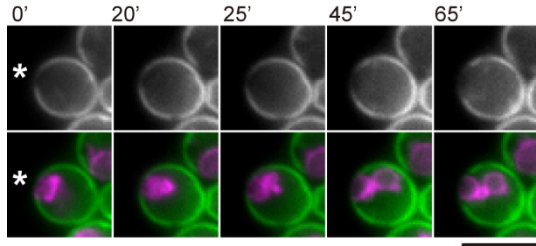

469

470 **Figure 6-Figure supplement 2 Fusion and fission of vacuoles in contact with the void**

471 **zone.**

472 Time-lapse imaging of the vacuole-void zone contact was performed. *cho1Δ* cells expressing  
473 GFP-Snc1-pm and Vph1-mRFP were grown in YPDA medium at 37°C. Fusion and fission of  
474 vacuoles in contact with the void zone are shown in the upper and lower panels, respectively.

475 Numbers indicate time in min. Asterisks indicate the V-V contact. Scale bars: 5 μm.

476

477 **Video 1 (thumbnail image)**

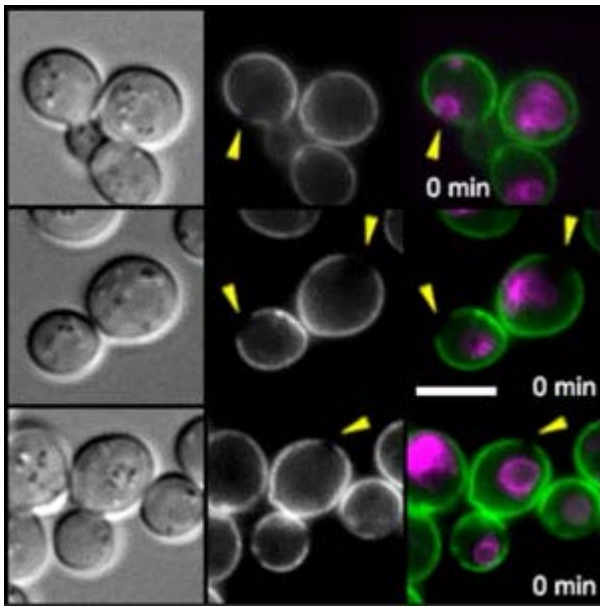

478

479 **Video 1**

480 Time-lapse imaging of the vacuole-void zone contact. Time-lapse imaging was performed as  
481 in Figure 6D and Materials and Methods. Three samples are shown. Yellow arrowheads  
482 indicate the void zone. Yellow circles indicate the V-V contact site. Scale bar: 5  $\mu$ m.

483

484 **Identification of the genes required for the formation of the void zone**

485 To further understand the mechanism of the void zone formation, we created a series of  
486 deletion mutants on the background of the *cho1* $\Delta$  or glucose-repressible *P<sub>GALI</sub>-3HA-CHO1*  
487 mutations and examined their effect on the generation of the void zone (Figure 7A). Various  
488 genes involved in sterol trafficking were tested, and the results indicate that *kes1* $\Delta$  (*osh4* $\Delta$ )  
489 mildly and *arv1* $\Delta$  significantly reduced the void zone formation. Kes1 is one of the yeast  
490 oxysterol-binding proteins that exchanges sterols for PI(4)P between the lipid membranes  
491 (Jiang, *et al.*, 1994; de Saint-Jean *et al.*, 2011). Arv1 was implicated in the GPI-anchor  
492 biosynthesis and transport and in intracellular sterol distribution (Kajiwara *et al.*, 2008; Beh  
493 and Rine, 2004). Both Kes1 and Arv1 are involved in the sterol transport; however, their  
494 contribution to the sterol transport to the plasma membrane is very low (Georgiev *et al.*, 2011;

495 Georgiev *et al.*, 2013). These proteins regulate sterol organization in the plasma membrane;  
496 the mutations influence the sensitivity to the sterol-binding drugs and sterol-extraction  
497 efficiency of M $\beta$ CD (Georgiev *et al.*, 2011; Georgiev *et al.*, 2013). These differences in sterol  
498 organization may influence the formation of the void zone. Npc2 is an orthologue of  
499 Niemann-Pick type C protein and plays an essential role together with Ncr1 in sterol insertion  
500 into the vacuolar membrane from the inside of the vacuole, which is required for the  
501 formation of the raft-like vacuolar domain during lipophagy in the stationary phase (Tsuji *et*  
502 *al.*, 2017). However, deletion of Npc2 did not influence generation of the void zone or  
503 formation of the V-V contacts accompanied with protein-free vacuolar domain (Figure 7—  
504 figure supplement 1A). This result suggests that the void zone is formed independently of  
505 Ncr1/Npc2-mediated sterol transport possibly because Ncr1/Npc2 are not involved in sterol  
506 organization in the plasma membrane. The vacuolar domains detected at the V-V contact  
507 region and generated during the stationary phase lipophagy are similar in appearance;  
508 however, the processes of their formation may be different.

509 The void zone formation was observed in the absence of Pep4, a major vacuolar protease,  
510 and Vac17, a myosin adapter required for inheritance of vacuoles. However, the void zone  
511 formation was strongly suppressed by deletion of Vma2 and Fab1.

512 Vma2 is a subunit of the V-ATPase that regulates pH homeostasis and functions as a pH  
513 sensor (Marshansky *et al.*, 2014). Consistent with this observation, other genes involved in  
514 pH homeostasis (*NHA1*, *NHX1*, *RIM21*, and *RIM101*) were required for the void zone  
515 formation (Figure 7A, pH regulation) (Sychrová *et al.*, 1999; Brett *et al.*, 2005; Obara *et al.*,  
516 2012). Thus, we examined the effect of pH of the medium on the formation of the void zone.  
517 The formation of the void zone was strongly suppressed by increasing pH in the medium from  
518 6.6 to 7.5. (Figure 7B). On the other hand, the low pH medium (pH 4.0) slightly increased the  
519 formation of the void zone. Interestingly, the frequency of the V-V contacts was significantly

520 reduced in the low pH medium (Figure 7C). The mechanism of these pH-dependent  
521 phenomena is unclear although they may be important in assessment of the molecular basis of  
522 the formation of the void zones and V-V contacts.

523 Fab1 is a phosphatidylinositol 3-phosphate (PI(3)P) 5-kinase that generates  
524 phosphatidylinositol 3,5-bisphosphate (PI(3,5)P<sub>2</sub>) (Cooke *et al.*, 1998). PI(3,5)P<sub>2</sub> functions as  
525 a signal lipid in intracellular homeostasis, adaptation, and retrograde membrane trafficking  
526 (Jin *et al.*, 2016). We speculated that the defects in the retrograde transport may indirectly  
527 influence the void zone formation in the plasma membrane and thus examined various genes  
528 involved in the membrane transport. Strikingly, conserved protein complexes, retromer, class  
529 C core vacuole/endosome tethering (CORVET), homotypic fusion and vacuole protein sorting  
530 (HOPS), and endosomal sorting complexes required for transport (ESCRT) were required for  
531 the void zone formation (Figure 7A and D). As the name implies, the Vps proteins belonging  
532 to these complexes were identified using mutants defective in vacuolar protein sorting (VPS)  
533 (Robinson *et al.*, 1988; Rothman *et al.*, 1989). Dysfunction of these complexes perturbs  
534 intracellular vesicle trafficking (Schmidt and Teis, 2012; Balderhaar and Ungermann, 2013;  
535 Burd and Cullen, 2014), which may influence the plasma membrane recycling of cargo and  
536 lipids involved in the void zone formation. Similarly, proteins involved in the retrograde  
537 transport, such as the SNAREs Pep12 and Tlg2, the epsin-like adapter Ent3/Ent5, and the  
538 clathrin adapter Gga1/Gga2, were required for the void zone formation. A dynamin-like  
539 GTPase Vps1, Arf-like GTPase Arl1, and Rab6 GTPase homologue Ypt6 are known to be  
540 closely related to the membrane trafficking (Vater *et al.*, 1992; Li and Warner, 1996;  
541 Rosenwald *et al.*, 2002). Consistent with this notion, *vps1Δ*, *arl1Δ*, and *ypt6Δ* inhibited the  
542 void zone formation. Impaired membrane transport in the inner membrane system can be  
543 manifested as the changes in the plasma membrane lipid organization and/or defects in the pH  
544 control. However, Apl2 and Apl1, the subunits of the adaptor complexes AP-1 and AP-2,

545 respectively, had little contribution to the void zone formation presumably because these  
546 mutants had insignificant disruption of the membrane trafficking compared to the effects of  
547 *ent3Δ*, *ent5Δ* and *gga1Δ gga2Δ* (Yeung *et al.*, 1999; Sakane *et al.*, 2006; Morvan *et al.*,  
548 2015). Deletion of *APL5*, which encodes the subunit of AP-3 responsible for the transport  
549 from the Golgi to the vacuole (Dell'Angelica, 2009), slightly reduced the void zone formation,  
550 suggesting the importance of the vacuolar functions for the void zone formation.

551 Deletion of the autophagy-related genes (*atg1Δ*, *atg10Δ*, *atg12Δ*, and *atg15Δ*) did not  
552 influence the void zone formation. *ATG1* is one of the core ATG genes (Mizushima *et al.*,  
553 2011). The void zone was generated and the V-V contact with the vacuolar microdomain was  
554 observed in the absence of Atg1 (Figure 7A, and Figure 7—figure supplement 1B). This  
555 result suggests that the void zone formation is independent of autophagy consistent with our  
556 notion that direct or indirect effects on lipid organization in the plasma membrane (e.g., *via*  
557 the Vps pathway) are influencing the void zone formation.

558 We also examined the effect of mutations in the flippase-related proteins. The deficiency of  
559 Cdc50 or Any1/Cfs1 localized in endosomes and the TGN had little effect on the void zone  
560 formation (Saito *et al.*, 2004; van Leeuwen *et al.*, 2016; Yamamoto *et al.*, 2017); however,  
561 disruption of Lem3 localized in the plasma membrane completely suppressed the generation  
562 of the void zone (Kato *et al.*, 2002). The Lem3-Dnf1/2 flippase complexes translocate  
563 glycerophospholipids, but not ceramides and sphingolipids, to the cytoplasmic leaflet of the  
564 lipid bilayer (Pomorski *et al.*, 2003; Saito *et al.*, 2004; Furuta *et al.*, 2007). We assumed that  
565 disruption of the phospholipid asymmetry by *lem3Δ* may influence ergosterol behaviour in  
566 the plasma membrane. To test this hypothesis, we examined the sensitivity to an antifungal  
567 ergosterol-binding drug, amphotericin B (AmB) (Kamiński, 2014). The results indicate that  
568 *lem3Δ* is highly sensitive to AmB, which is detected in the *cho1Δ* background cells, and this  
569 effect was cancelled by addition of *erg6Δ* that causes defects in ergosterol biosynthesis



570 (Figure 7E). Thus, the disruption of phospholipid asymmetry alters the ergosterol distribution  
 571 in the plasma membrane, thereby suppressing the void zone formation (see discussion).

572

573 **Figure 7**

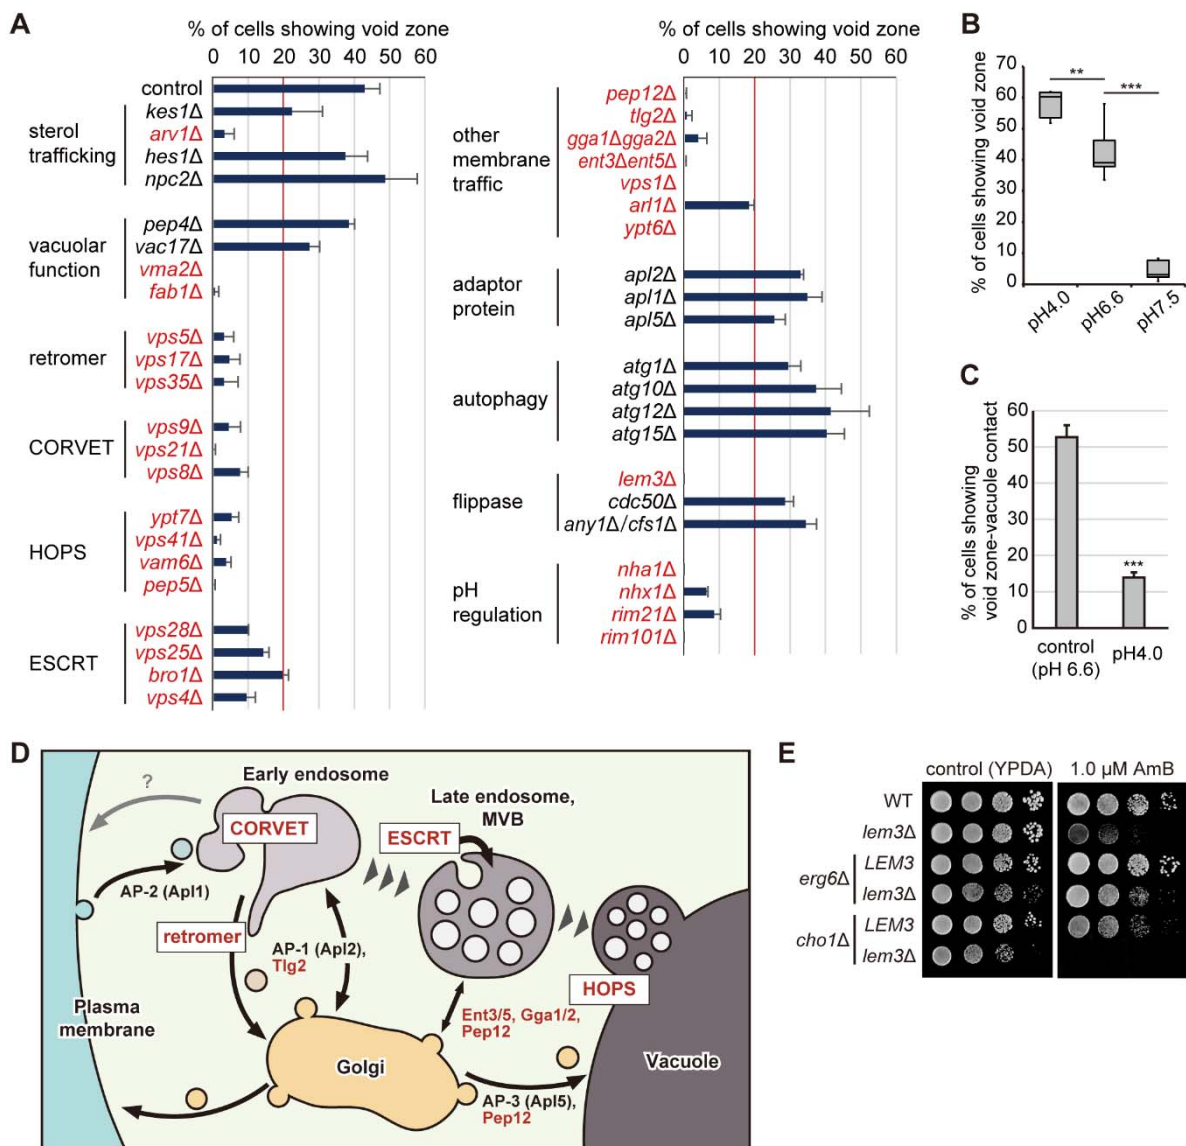

574

575 **Figure 7 A search for the genes required for the void zone formation**

576 (A) Frequency of the void zone in the mutant cells generated on *cho1Δ* background or under  
 577 *Cho1*-depleted conditions. The incidence of the void zone was determined ( $n > 100$  cells,  
 578 three independent experiments) and is shown as the mean and SD. The mutations responsible  
 579 for the low incidence (under 20%) are shown in red. (B) The void zone formation is

580 suppressed by high pH. *cho1*Δ cells expressing GFP-Snc1-pm were grown overnight in  
581 YPDA at the indicated pH at 37°C. The incidence of the void zone was determined (n > 100  
582 cells, five independent experiments) and is shown as a box plot. Asterisks indicate significant  
583 differences according to the Tukey–Kramer test (\*\*, p < 0.005; \*\*\*, p < 0.001). (C) Low pH  
584 decreases the frequency of the V-V contact. *cho1*Δ cells expressing GFP-Snc1-pm and Vph1-  
585 mRFP were grown in YPDA at the indicated pH at 37°C. The incidence of the V-V contacts  
586 was determined (n > 100 cells with the void zone, three independent experiments) and is  
587 shown as the mean and SD. Asterisks indicate a significant difference according to the  
588 Student’s t-test (\*\*\*, p < 0.001). (D) A scheme of the membrane trafficking. Proteins and  
589 protein complexes required for the formation of the void zone are shown in red. (E) The loss  
590 of phospholipid asymmetry in the plasma membrane results in high sensitivity to  
591 amphotericin B. Serial dilutions of the cultures were spotted onto YPDA plates containing 1.0  
592 μM amphotericin B and incubated at 30°C for 2 d.

593

594 **Figure 7 S1**

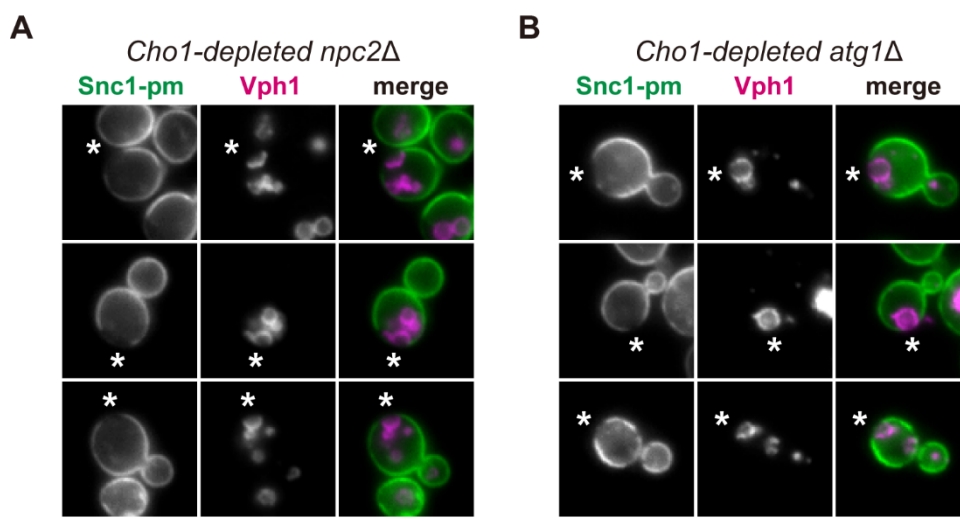

596 **Figure 7-Figure supplement 1 Npc2 and Atg1 are not essential for the formation of the**  
597 **void zone and the V-V contacts.**

598 (A and B) The void zone and the V-V contact in the absence of Npc2 and Atg1. Cells  
599 expressing GFP-Snc1-pm and Vph1-mRFP were grown in YPDA medium at 37°C. Asterisks  
600 indicate the V-V contact. Scale bars: 5  $\mu$ m.

601

## 602 **Discussion**

603 In the artificial membranes, phase separation causes micron-scale separation of proteins and  
604 lipids; such large separation does not occur in the plasma membrane of the living cells. The  
605 mechanism that enables random distribution of proteins and lipids throughout the plasma  
606 membranes on the macroscopic scale by preventing large-scale phase separation has not been  
607 understood. We found that in PS-deficient cells grown at high temperatures, the protein-free  
608 membrane domain “void zone” develops in the plasma membrane and exhibits Lo phase-like  
609 properties (Figure 8). We propose a new role of PS in membrane organization and suggest  
610 that PS prevents the occurrence of abnormal membrane domains due to phase separation and  
611 ensures macroscopic homogeneity of the distribution of the molecules on the plasma  
612 membrane.

613

### 614 **Mechanisms of the generation and disappearance of the void zone**

615 PS is a phospholipid mainly distributed in the inner leaflet of the plasma membrane and has a  
616 relatively high affinity for cholesterol (Maekawa and Fairn, 2015; Nyholm *et al.*, 2019).  
617 Therefore, loss of PS may alter relative affinity of the phospholipids for ergosterol in the inner  
618 leaflet and may also influence the transbilayer distribution of ergosterol. Almost all yeast  
619 phospholipids, including PS, have at least one unsaturated fatty acid; however, a small  
620 fraction of phosphatidylinositol (PI) has only saturated fatty acids (Schneiter *et al.*, 1999;  
621 Ejsing *et al.*, 2009; Klose *et al.*, 2012). Molecular species of PS, PE, PC, and PI were  
622 characterized in the isolated plasma membrane; interestingly, 29.2% of PI have two saturated

623 fatty acids (Schneider *et al.*, 1999). Relative affinity of ergosterol to various phospholipid  
624 species is unclear. One hypothesis is that ergosterol is not clustered due to the interactions  
625 with unsaturated PS in the wild-type cells; however, in *cho1Δ* cells, saturated PI becomes the  
626 most dominant interaction partner of ergosterol in the inner leaflet of the plasma membrane  
627 thus creating a driving force for phase separation. When PS is resynthesized in the *cho1Δ*  
628 cells after the addition of lyso-PS, the void zone may disappear because PS becomes the  
629 predominant interaction partner of ergosterol (Figure 3B and C).

630 Generation of the void zone requires PS deficiency and high temperature conditions. In  
631 GUVs and GPMVs, lower temperature is favourable for phase separation, which occurs  
632 within seconds (Dietrich *et al.*, 2001; Veatch and Keller, 2003; Baumgart *et al.*, 2007;  
633 Levental I *et al.*, 2009). On the other hand, the development of the void zone requires  
634 incubation for several hours at a high temperature (Figure 1B); thus, we speculate that the  
635 remodelling of the lipid composition under high temperature may trigger the void zone  
636 formation in the *cho1Δ* cells. In yeast, high temperature reduces the degree of unsaturation  
637 and increases the acyl chain length of glycerophospholipids (Klose *et al.*, 2012), and these  
638 events promote phase separation in the liposomes (Engberg *et al.*, 2016). A combination of  
639 PS deficiency and high temperature-induced lipid remodelling may create a specific  
640 membrane environment that results in the void zone development.

641 The void zones rapidly disappeared when the *cho1Δ* cells undergo a diauxic shift (Figure  
642 2C) or when glucose or ATP is depleted from the medium (Figure 2D). During glucose  
643 starvation, activities of the plasma membrane H<sup>+</sup>-ATPase Pma1 and V-ATPase are reduced  
644 (Young *et al.*, 2010; Dechant *et al.*, 2010). Therefore, the disappearance of the void zone may  
645 be caused by a disturbance of pH homeostasis consistent with the suppression of the void  
646 zone formation by mutations in the genes involved in pH homeostasis, including *VMA2*  
647 (Figure 7A). Reduced activities of Pma1 and V-ATPases lead to acidification of the cytosol,

648 and the void zone formation is also inhibited in the medium with elevated pH (Figure 7B).  
649 The relationship between pH and phase separation is largely unknown; however, it has been  
650 reported that phase separation occurs at low pH and not at high pH in the artificial membranes  
651 that mimic human stratum corneum (Plasencia *et al.*, 2007).

652 Our results indicate that long chain fatty acids and hydroxylation of sphingolipids are  
653 necessary for the void zone formation (Figure 5B). It has been reported that GUVs prepared  
654 from the yeast total lipids have extensive phase separation, which depends on long fatty acid  
655 elongation and hydroxylation of sphingolipids (Klose *et al.*, 2010). M(IP)2C with a C26 fatty  
656 acid is the most common yeast sphingolipid species and its levels are significantly reduced in  
657 the *elo2* $\Delta$  and *elo3* $\Delta$  mutants (Oh *et al.*, 1997; Ejsing *et al.*, 2009). A recent study using  
658 asymmetric GUVs suggested that C24 SM and not C16 SM has a role in cholesterol retention  
659 in the inner leaflet of the lipid bilayer (Courtney *et al.*, 2018). Consistently,  
660 dehydroergosterol, a closely related fluorescent analogue of ergosterol, is mainly located in  
661 the inner leaflet of the plasma membrane, and this asymmetry is maintained by sphingolipids  
662 in yeast (Solanko *et al.*, 2018). This type of interaction of ergosterol with sphingolipids may  
663 be necessary for the void zone formation.

664 Ceramides may be another factor in the void zone formation in addition to PS, sterol, and  
665 sphingolipids. Ceramides form highly ordered domains in the model membranes; however,  
666 their interactions with cholesterol and phospholipids in the phase separation are very complex  
667 (Goñi and Alonso, 2009; López-Montero *et al.*, 2010; García-Arribas *et al.*, 2016). Yeast cells  
668 contain numerous long-chain ceramides in the plasma membrane (Schneiter *et al.*, 1999), and  
669 ceramide levels has been shown to increase at high temperature (Wells *et al.*, 1998; Klose *et*  
670 *al.*, 2012).

671 Analysis using several mutant strains on the *cho1* background revealed that retrograde  
672 intracellular trafficking has a significant effect on the void zone formation (Figure 7A).

673 Perturbed membrane transport may alter the distribution of the proteins and the key lipids as  
674 described above. Moreover, *ARV1* and *LEM3* are important for the void zone formation. In  
675 *arv1Δ* cells and  $\Delta$ tether cells that lack the ER-PM contacts, the transport of ergosterol to the  
676 plasma membrane is essentially unchanged, whereas there were significant changes in  
677 ergosterol accessibility to the compounds, such as increased efficiency of ergosterol  
678 extraction with M $\beta$ CD and increased sensitivity to the sterol-binding drug nystatin (Georgiev  
679 *et al.* 2013; Quon *et al.*, 2018). Similarly, *lem3Δ* does not change the total ergosterol level  
680 (Mioka *et al.*, 2018), and Dnf1 and Dnf2 do not contribute to the asymmetric distribution of  
681 the ergosterol analogues across the plasma membrane bilayer (Solanko *et al.*, 2018).  
682 However, *lem3Δ* cells are highly sensitive to AmB (Figure 7E). Thus, similar to the *arv1Δ*  
683 and  $\Delta$ tether mutations, *lem3Δ* may alter the ergosterol distribution in the plasma membrane  
684 thus preventing the formation of the void zone.

685

### 686 **The void zone has the exclusivity similar to Lo domains.**

687 Four observations support the notion that the void zone is a Lo phase-like domain: 1) absence  
688 of the transmembrane proteins, 2) absence of certain peripheral membrane proteins, 3)  
689 exclusion of certain types of glycerophospholipids, and 4) enrichment in sterols and the  
690 contribution of sphingolipids.

691 We confirmed that the transmembrane proteins were completely excluded from the void  
692 zone by the freeze-fracture replica labelling (Figure 1G and H). Similar segregation of the  
693 transmembrane proteins has been observed in the Lo domains in computer simulations,  
694 GUVs, and GPMVs (Baumgart *et al.*, 2007; Sengupta *et al.*, 2008; Kaiser *et al.*, 2009; Schäfer  
695 *et al.*, 2011); however, this is the first report on a large and stable separation detected in the  
696 plasma membrane of the living cells.

697 We also found that the lipid-anchored Ras2 cannot enter the void zone (Figure 4B). In the  
698 phase-separated artificial membranes, similar lipid-anchored peripheral proteins are also  
699 excluded from the Lo domains and separated into the Ld domains (Baumgart *et al.*, 2007;  
700 Sengupta *et al.*, 2008). In addition, the C-terminal region of Gap1 (Gap1C), which has an  
701 amphipathic helix, avoided the void zone (Figure 4B). In the artificial membranes, GTP-  
702 bound Arf1 can bind lipid membranes of variable curvature and lipid composition via its N-  
703 terminal amphipathic helix; however, Arf1 does not bind to the Lo domains (Krauss *et al.*,  
704 2008; Manneville *et al.*, 2008; Giménez-Andrés *et al.*, 2018). In the case of Ras2 and Gap1C,  
705 the void zone properties were similar to those of the Lo domains in the artificial membranes.  
706 However, a GPI-anchored protein (GPI-AP), Gas1, does not have any significant separation  
707 in the void zone (Figure 4B), whereas mammalian GPI-AP has been reported to prefer the Lo  
708 domains in GPMVs (Baumgart *et al.*, 2007; Sengupta *et al.*, 2008). This discrepancy may be  
709 due to the differences in the nature of GPI-APs in yeast versus mammals (Pittet and  
710 Conzelmann, 2007; Fujita and Kinoshita, 2012; Muñiz and Zurzolo, 2014): 1) the plasma  
711 membrane-localized GPI-APs in yeast closely interact with the cell wall; 2) the fatty acid  
712 length of the GPI-anchor differs between yeast and mammals; 3) the nanodomains of GPI-  
713 APs have been visualized in mammalian cells (Sharma *et al.*, 2004) but have not been  
714 reported in yeast.

715 In addition to proteins, lipid probes suggest the separation of the phospholipids, PI(4)P,  
716 PI(4,5)P2, and PA, from the void zone (Figure 5E). The majority of the yeast phospholipids  
717 have mono- or di-unsaturated fatty acids (Schneiter *et al.*, 1999; Ejsing *et al.*, 2009; Klose *et al.*,  
718 2012), and the unsaturated phospholipids, such as dioleoylphosphatidylethanolamine  
719 (DOPE), are separated from the Lo domains in the artificial membranes (Baumgart *et al.*,  
720 2007; Sengupta *et al.*, 2008; Kaiser *et al.*, 2009). Therefore, absence of the lipid probes in the  
721 void zone is consistent with our notion that the void zone is a Lo-like domain. If the void zone



722 would have been composed of the PI species with saturated fatty acids as described above,  
723 yeast PI kinases might have preferred the PI species with unsaturated fatty acids as the  
724 substrates.

725

## 726 **Membrane contact between the void zone and vacuoles**

727 We have detected the contact between the void zone and the vacuoles (Figure 6B and D,  
728 Figure 8A), and the time-lapse imaging revealed that this contact lasted for at least 30 min in  
729 most cases (Figure 6D and E). These results suggest that the contact vacuoles may not  
730 contribute to the rapid degradation and disappearance of the void zone. The contact vacuoles  
731 are more likely to play a role in sealing the void zone to protect the cells. Recent studies  
732 reported that in the phase-separated membranes with the Ld and Lo domains, membrane  
733 permeability is increased at the interface between the two domains (Cordeiro, 2018). A  
734 similar result indicated that the ER-PM contact sites are important for the maintenance of the  
735 integrity of the plasma membrane (Omnus *et al.*, 2016; Collado *et al.*, 2019). In this study, we  
736 found that void zone has Lo phase-like properties and that cortical ER is dissociated from the  
737 void zone. Therefore, it is possible that the void zone induces high local permeability and low  
738 integrity; thus, the void zone may be a fragile region of the plasma membrane. The V-V  
739 contact may represent a protective cellular response to these plasma membrane abnormalities.

740 Our results also suggest that membrane domains may be formed on the vacuolar  
741 membranes in contact with the void zone (Figure 6C). A contact between the membrane  
742 domains accompanied by protein separation has been detected in the nucleus-vacuole junction  
743 (NVJ), which is one of the MCSs that excludes certain proteins from the nuclear and vacuolar  
744 membranes (Pan *et al.*, 2000; Dawaliby and Mayer, 2010; Toulmay and Prinz, 2013). The  
745 transmembrane proteins appear to be completely excluded from the void zone (Figure 1H);

746 hence, the lipid-protein interactions via protein tethering may be present in the V-V contact  
747 similar to that detected in the ER-PM contact sites.

748

## 749 **Figure 8**

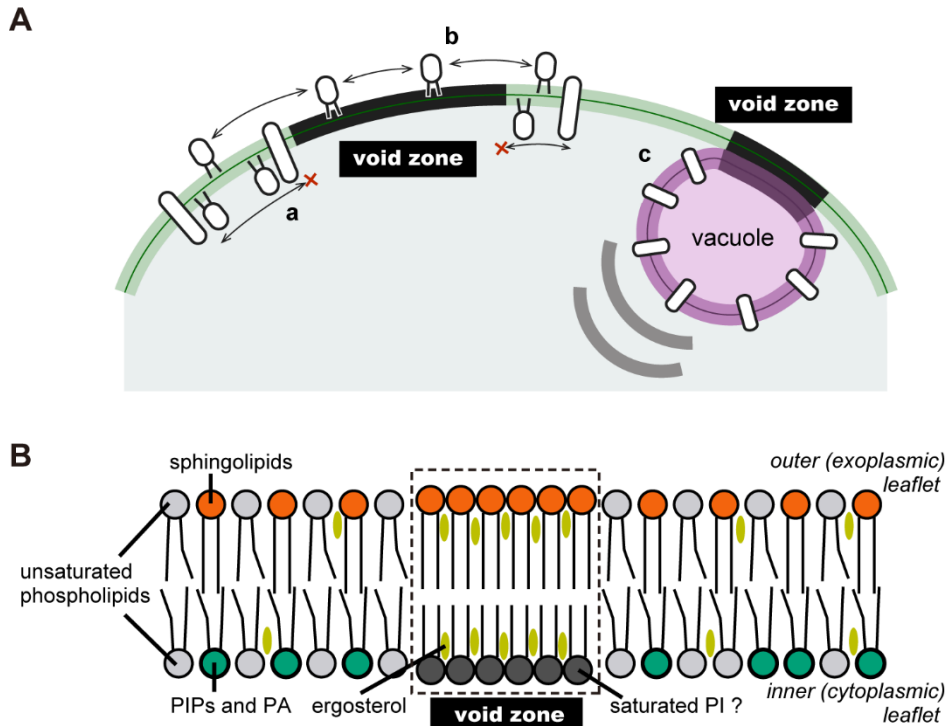

750

## 751 **Figure 8 Summary and a model of the void zone**

752 (A) Characteristics of the void zone revealed in this study. Our results suggest the following  
753 properties of the void zone: (a) transmembrane proteins and peripheral membrane protein  
754 distributed in the inner leaflet cannot enter the void zone by lateral diffusion; (b) a GPI-AP,  
755 Gas1, localized in the outer layer of the plasma membrane is not influenced by the void zone;  
756 and (c) vacuoles move to form a stable contact with the void zone, and a vacuolar membrane  
757 domain also appears to be formed at this contact site. (B) The putative structure of the void  
758 zone. Our results suggest that the void zone is a Lo-like domain (see discussion).

759

## 760 **Materials and Methods**

### 761 **Chemicals, Media, and Genetic Manipulation**

762 Chemicals were purchased from Wako Pure Chemicals Industries (Osaka, Japan) unless  
763 indicated otherwise. Standard genetic manipulations and plasmid transformation of yeast were  
764 performed as described previously (Elble, 1992; Guthrie and Fink, 2002). Yeast strains were  
765 cultured in rich YPDA medium containing 1% yeast extract (Difco Laboratories, MI, USA),  
766 2% Bacto peptone (Difco), 2% glucose, and 0.01% adenine, or synthetic dextrose (SD)  
767 medium containing 0.17% yeast nitrogen base w/o amino acids and ammonium sulfate  
768 (Difco), 0.5% ammonium sulfate, 2% glucose, and the required amino acids or nucleic acid  
769 bases. To induce the *GALI* promoter, 3% galactose and 0.2% sucrose were used as carbon  
770 sources instead of glucose (YPGA medium). To deplete PS in the *P<sub>GALI</sub>-3HA-CHO1*  
771 background cells, the cells were grown on YPDA plates for more than 1 day before  
772 inoculation into YPDA medium. Strains carrying *URA3*-harbouring plasmids were cultured in  
773 SD medium containing 0.5% casamino acids (Difco), 0.03% tryptophan, and 0.01% adenine  
774 (SDA-U). When *cho1Δ* or Cho1-depleted strains were cultured in SD or SDA-U medium,  
775 ethanolamine was added to the final concentration of 1 mM. For serial dilution spot assays,  
776 cells were grown to early log phase in an appropriate medium and adjusted to a concentration  
777 of  $1.0 \times 10^7$  cells/ml. After serial tenfold dilution, 4- $\mu$ l drops were spotted onto appropriate  
778 plates.

779

## 780 **Strains and Plasmids**

781 Yeast strains and plasmids used in this study are listed in Tables 1 and 2 (Supplemental Files),  
782 respectively. Standard molecular biological techniques were used for the construction of the  
783 plasmids, PCR amplification, and DNA sequencing (Sambrook and Russell, 2001). PCR-  
784 based procedures were used to construct the gene deletions and gene fusions with GFP,  
785 mRFP, 3HA, and the *GALI* promoter (Longtine *et al.*, 1998). All constructs produced by the  
786 PCR-based procedure were verified by colony PCR to confirm that the replacement occurred

787 at the expected locus. Sequences of the PCR primers are available upon request.

788 To construct the *LEU2::mRFP-GAS1* strain, pMF608 was linearized and integrated into the  
789 *LEU2* locus. To construct the pRS316-mRFP-GAS1 (pKT2191), the SacII-XmaI fragment  
790 from pMF608 was inserted into the SacII-SmaI gap of pRS316. To construct pRS416-GFP-  
791 GAP1C (pKT2205), the C-terminal cytoplasmic region of Gap1 corresponding to 552-602  
792 amino acids (Popov-Čeleketić *et al.*, 2016) and 257 bp downstream of the *GAP1* coding  
793 region were amplified by PCR, and *PEP12* region of pRS416-GFP-PEP12 (pKT1487) (Furuta  
794 *et al.*, 2007) was replaced with the PCR product. To construct pRS316-mCherry-  
795 SPO20PABD (pKT2206), the DNA fragments of mCherry and the PA-binding region of  
796 Spo20 corresponding to 51-91 amino acids (Nakanishi *et al.*, 2004) were inserted into  
797 pRS316 along with *P<sub>TPII</sub>* and *T<sub>ADHI</sub>*.

798

### 799 **Microscopic Observations**

800 Cells were observed using a Nikon ECLIPSE E800 microscope (Nikon Instec, Tokyo, Japan)  
801 equipped with an HB-10103AF super-high-pressure mercury lamp and a 1.4 numerical  
802 aperture 100× Plan Apo oil immersion objective lens (Nikon Instec) with appropriate  
803 fluorescence filter sets (Nikon Instec) or differential interference contrast optics. Images were  
804 acquired using a cooled digital charge-coupled device (CCD) camera (C4742-95-12NR;  
805 Hamamatsu Photonics, Hamamatsu, Japan) and the AQUACOSMOS software (Hamamatsu  
806 Photonics).

807 GFP-, mRFP-, or mCherry-tagged proteins were observed in the living cells grown in early  
808 to mid-logarithmic phase, harvested, and resuspended in SD medium. Cells were immediately  
809 observed using a GFP bandpass (for GFP) or a G2-A (for mRFP and mCherry) filter set.  
810 Observations were compiled based on the examination of at least 100 cells. For  
811 supplementation of 18:1 lyso-PS (Sigma-Aldrich, St. Louis, MO, USA), a stock solution (10

812 mg/mL in 0.1% Nonidet P-40) was added to the culture media to the final concentration of 20  
813  $\mu\text{M}$ . For sterol staining, cells were fixed with 5% formaldehyde, washed with PBS, and  
814 labelled for 10 min in 0.5 mg/ml filipin (Sigma-Aldrich) in PBS. For staining of the plasma  
815 membrane by FM4-64 (Thermo Fisher Scientific, MA, USA), cell suspensions were mixed  
816 with an equal volume of 100  $\mu\text{M}$  FM4-64 on a glass slide and observed immediately. For  
817 staining of the vacuolar membranes, cells were labelled for 15 min in 5 $\mu\text{M}$  FM4-64, washed  
818 with SD medium, and immediately observed. Fluorescence of filipin and FM4-64 was  
819 observed using a UV and a G2-A filter set, respectively. For the time-lapse imaging, cell  
820 suspension was spotted onto a thin layer of SD medium containing 1 mM ethanolamine and  
821 2% agarose on a glass slide, which was quickly covered with a coverslip. During the time-  
822 lapse imaging, the sample was maintained at 37°C by a Thermo Plate (Tokai Hit, Fujinomiya,  
823 Japan). The incidence of the void zone was assessed based on three or more images of  
824 different focal planes, and based on single focal plane in the time-lapse imaging.

825

### 826 **Freeze-fracture replica labelling**

827 Yeast cells sandwiched between a 20- $\mu\text{m}$ -thick copper foil and a flat aluminium disc  
828 (Engineering Office M. Wohlwend, Sennwald, Switzerland) were quick-frozen by high-  
829 pressure freezing using an HPM 010 high-pressure freezing machine according to the  
830 manufacture's instruction (Leica Microsystems, Wetzlar, Germany). The frozen specimens  
831 were transferred to the cold stage of a Balzers BAF 400 apparatus and fractured at  $-115^\circ$  to  
832  $-105^\circ\text{C}$  under vacuum at  $\sim 1 \times 10^{-6}$  mbar.

833 For genuine morphological observation, samples were exposed to electron-beam evaporation  
834 of platinum-carbon (Pt/C) (1–2 nm thickness) at an angle of  $45^\circ$  to the specimen surface  
835 followed by carbon (C) (10–20 nm) at an angle of  $90^\circ$ . After thawing, the replicas were treated  
836 with household bleach to digest biological materials before mounting on the EM grids for

837 observation.

838 For labelling, freeze-fractured samples were subjected to a three-step electron-beam  
839 evaporation: C (2–5 nm), Pt/C (1–2 nm), and C (10–20 nm) as described previously (Fujita *et*  
840 *al.*, 2010). Thawed replicas were treated with 2.5% SDS in 0.1 M Tris-HCl (pH 8.0) at 60°C  
841 overnight; with 0.1% Westase (Takara Bio) in McIlvain buffer (37 mM citrate and 126 mM  
842 disodium hydrogen phosphate, pH 6.0) containing 10 mM EDTA, 30% fetal calf serum, and a  
843 protease inhibitor cocktail for 30 min at 30°C; and with 2.5% SDS in 0.1 M Tris-HCl (pH 8.0)  
844 at 60°C overnight. For labelling of GFP-Pma1, replicas were incubated at 4°C overnight with  
845 a rabbit anti-GFP antibody in PBS containing 1% BSA followed by colloidal gold (10 nm)-  
846 conjugated protein A (University of Utrecht, Utrecht, The Netherlands) for 60 min at 37°C in  
847 1% BSA in PBS. Replicas were observed and imaged with a JEOL JEM-1011 EM (Tokyo,  
848 Japan) using a CCD camera (Gatan, Pleasanton, CA, USA).

849

## 850 **Lipid analysis**

851 Total lipids were extracted basically by the Bligh and Dyer method (Bligh and Dyer, 1959).  
852 Cells were grown in 100-200 ml of YPDA medium to 0.8-1.0 OD<sub>600</sub>/ml at 30°C or 37°C. The  
853 cells were collected and resuspended in 3.8 ml of chloroform-methanol-0.1 M HCl/0.1 M KCl  
854 (1:2:0.8) and lysed by vortexing with glass beads for 1 min. Then, 1.0 ml each of chloroform  
855 and 0.1 M HCl/0.1 M KCl were added followed by centrifugation, isolation of the lipid-  
856 containing phase, and evaporation of the solvent. The extracted lipids were dissolved in an  
857 appropriate volume of chloroform. Total phospholipids were determined by the phosphorus  
858 assay (Rouser *et al.*, 1970).

859 For ergosterol analysis, the samples containing 20 nmol phosphate were subjected to TLC on  
860 an HPTLC plate (Silica gel 60; Merck Millipore, MA, USA) in the solvent system  
861 hexane/diethyl ether/acetic acid (80:20:1) (Dodge and Phillips, 1967). After migration, the

862 plates were dried and sprayed with a 10% (w/v) cupric sulfate solution in 8% (w/v)  
863 orthophosphoric acid. Plates were heated in an oven at 180°C for 20 min. Plates were scanned  
864 with a CanoScan 8800F image scanner (Canon, Tokyo, Japan) and the acquired images were  
865 quantified using the ImageJ software.

866

## 867 **Statistical Analysis**

868 Significant differences in Figures 5C and 7C were determined using a two-sided Student's *t*  
869 test. Significant differences for all other figures were determined by the Tukey–Kramer test.

870

## 871 **Acknowledgements**

872 We thank Masahiko Watanabe (Hokkaido University, Sapporo, Japan) for providing the  
873 rabbit anti-GFP antibody for freeze-fracture replica labelling. We thank Takehiko Yoko-o  
874 (AIST, Tokyo, Japan) for providing the pMF608 plasmid. We thank our colleagues in the  
875 Tanaka laboratory for valuable discussions and Eriko Itoh for technical assistance. This work  
876 was supported by Japan Society for the Promotion of Science (JSPS) KAKENHI grants  
877 18K14645 (T.M.), 18K06104 (T.K.), and 19K06536 (K.T.).

878

## 879 **Competing interests**

880 The authors have no conflict of interests to declare.

881

## 882 **Reference**

883 Arikkeith, D., Nelson, R., & Vance, J. E. (2008). Defining the importance of  
884 phosphatidylserine synthase-1 (PSS1): unexpected viability of PSS1-deficient mice. *J*  
885 *Biol Chem*, 283(19), 12888-12897. doi:10.1074/jbc.M800714200

886 Arthington, B. A., Bennett, L. G., Skatrud, P. L., Guynn, C. J., Barbuch, R. J., Ulbright, C. E.,



- 887           & Bard, M. (1991). Cloning, disruption and sequence of the gene encoding yeast C-5  
888           sterol desaturase. *Gene*, *102*(1), 39-44. doi:10.1016/0378-1119(91)90535-j
- 889   Atkinson, K. D., Jensen, B., Kolat, A. I., Storm, E. M., Henry, S. A., & Fogel, S. (1980).  
890           Yeast mutants auxotrophic for choline or ethanolamine. *J Bacteriol*, *141*(2), 558-564.
- 891   Audhya, A., & Emr, S. D. (2002). Stt4 PI 4-kinase localizes to the plasma membrane and  
892           functions in the Pkc1-mediated MAP kinase cascade. *Dev Cell*, *2*(5), 593-605.  
893           doi:10.1016/s1534-5807(02)00168-5
- 894   Balderhaar, H. J., & Ungermann, C. (2013). CORVET and HOPS tethering complexes -  
895           coordinators of endosome and lysosome fusion. *J Cell Sci*, *126*(Pt 6), 1307-1316.  
896           doi:10.1242/jcs.107805
- 897   Balla, T. (2013). Phosphoinositides: tiny lipids with giant impact on cell regulation. *Physiol*  
898           *Rev*, *93*(3), 1019-1137. doi:10.1152/physrev.00028.2012
- 899   Bauer, B. E., Wolfger, H., & Kuchler, K. (1999). Inventory and function of yeast ABC  
900           proteins: about sex, stress, pleiotropic drug and heavy metal resistance. *Biochim*  
901           *Biophys Acta*, *1461*(2), 217-236. doi:10.1016/s0005-2736(99)00160-1
- 902   Baumgart, T., Hammond, A. T., Sengupta, P., Hess, S. T., Holowka, D. A., Baird, B. A., &  
903           Webb, W. W. (2007). Large-scale fluid/fluid phase separation of proteins and lipids in  
904           giant plasma membrane vesicles. *Proc Natl Acad Sci U S A*, *104*(9), 3165-3170.  
905           doi:10.1073/pnas.0611357104
- 906   Baumgart, T., Hess, S. T., & Webb, W. W. (2003). Imaging coexisting fluid domains in  
907           biomembrane models coupling curvature and line tension. *Nature*, *425*(6960), 821-  
908           824. doi:10.1038/nature02013
- 909   Beh, C. T., & Rine, J. (2004). A role for yeast oxysterol-binding protein homologs in  
910           endocytosis and in the maintenance of intracellular sterol-lipid distribution. *J Cell Sci*,  
911           *117*(Pt 14), 2983-2996. doi:10.1242/jcs.01157

- 912 Bhattacharya, S., Chen, L., Broach, J. R., & Powers, S. (1995). Ras membrane targeting is  
913 essential for glucose signaling but not for viability in yeast. *Proc Natl Acad Sci U S A*,  
914 92(7), 2984-2988. doi:10.1073/pnas.92.7.2984
- 915 Bligh, E. G., & Dyer, W. J. (1959). A rapid method of total lipid extraction and purification.  
916 *Can J Biochem Physiol*, 37(8), 911-917. doi:10.1139/o59-099
- 917 Brett, C. L., Tukaye, D. N., Mukherjee, S., & Rao, R. (2005). The yeast endosomal  
918 Na<sup>+</sup>K<sup>+</sup>/H<sup>+</sup> exchanger Nhx1 regulates cellular pH to control vesicle trafficking. *Mol*  
919 *Biol Cell*, 16(3), 1396-1405. doi:10.1091/mbc.e04-11-0999
- 920 Burd, C., & Cullen, P. J. (2014). Retromer: a master conductor of endosome sorting. *Cold*  
921 *Spring Harb Perspect Biol*, 6(2). doi:10.1101/cshperspect.a016774
- 922 Carquin, M., D'Auria, L., Pollet, H., Bongarzone, E. R., & Tyteca, D. (2016). Recent progress  
923 on lipid lateral heterogeneity in plasma membranes: From rafts to submicrometric  
924 domains. *Prog Lipid Res*, 62, 1-24. doi:10.1016/j.plipres.2015.12.004
- 925 Cho, K. J., van der Hoeven, D., Zhou, Y., Maekawa, M., Ma, X., Chen, W., . . . Hancock, J.  
926 F. (2015). Inhibition of Acid Sphingomyelinase Depletes Cellular Phosphatidylserine  
927 and Mislocalizes K-Ras from the Plasma Membrane. *Mol Cell Biol*, 36(2), 363-374.  
928 doi:10.1128/mcb.00719-15
- 929 Collado, J., Kalemanov, M., Campelo, F., Bourgoint, C., Thomas, F., Loewith, R., . . .  
930 Fernández-Busnadiego, R. (2019). Tricalbin-Mediated Contact Sites Control ER  
931 Curvature to Maintain Plasma Membrane Integrity. *Dev Cell*, 51(4), 476-487.e477.  
932 doi:10.1016/j.devcel.2019.10.018
- 933 Cooke, F. T., Dove, S. K., McEwen, R. K., Painter, G., Holmes, A. B., Hall, M. N., . . .  
934 Parker, P. J. (1998). The stress-activated phosphatidylinositol 3-phosphate 5-kinase  
935 Fab1p is essential for vacuole function in *S. cerevisiae*. *Curr Biol*, 8(22), 1219-1222.  
936 doi:10.1016/s0960-9822(07)00513-1

- 937 Cordeiro, R. M. (2018). Molecular Structure and Permeability at the Interface between Phase-  
938 Separated Membrane Domains. *J Phys Chem B*, *122*(27), 6954-6965.  
939 doi:10.1021/acs.jpcc.8b03406
- 940 Courtney, K. C., Pezeshkian, W., Raghupathy, R., Zhang, C., Darbyson, A., Ipsen, J. H., . . .  
941 Zha, X. (2018). C24 Sphingolipids Govern the Transbilayer Asymmetry of  
942 Cholesterol and Lateral Organization of Model and Live-Cell Plasma Membranes.  
943 *Cell Rep*, *24*(4), 1037-1049. doi:10.1016/j.celrep.2018.06.104
- 944 Dawaliby, R., & Mayer, A. (2010). Microautophagy of the nucleus coincides with a vacuolar  
945 diffusion barrier at nuclear-vacuolar junctions. *Mol Biol Cell*, *21*(23), 4173-4183.  
946 doi:10.1091/mbc.E09-09-0782
- 947 de Almeida, R. F., Fedorov, A., & Prieto, M. (2003).  
948 Sphingomyelin/phosphatidylcholine/cholesterol phase diagram: boundaries and  
949 composition of lipid rafts. *Biophys J*, *85*(4), 2406-2416. doi:10.1016/s0006-  
950 3495(03)74664-5
- 951 De Craene, J. O., Coleman, J., Estrada de Martin, P., Pypaert, M., Anderson, S., Yates, J. R.,  
952 3rd, . . . Novick, P. (2006). Rtn1p is involved in structuring the cortical endoplasmic  
953 reticulum. *Mol Biol Cell*, *17*(7), 3009-3020. doi:10.1091/mbc.e06-01-0080
- 954 de Saint-Jean, M., Delfosse, V., Douguet, D., Chicanne, G., Payrastre, B., Bourguet, W., . . .  
955 Drin, G. (2011). Osh4p exchanges sterols for phosphatidylinositol 4-phosphate  
956 between lipid bilayers. *J Cell Biol*, *195*(6), 965-978. doi:10.1083/jcb.201104062
- 957 Dechant, R., Binda, M., Lee, S. S., Pelet, S., Winderickx, J., & Peter, M. (2010). Cytosolic pH  
958 is a second messenger for glucose and regulates the PKA pathway through V-ATPase.  
959 *Embo j*, *29*(15), 2515-2526. doi:10.1038/emboj.2010.138
- 960 Dell'Angelica, E. C. (2009). AP-3-dependent trafficking and disease: the first decade. *Curr*  
961 *Opin Cell Biol*, *21*(4), 552-559. doi:10.1016/j.ceb.2009.04.014

- 962 Dickson, R. C., Nagiec, E. E., Wells, G. B., Nagiec, M. M., & Lester, R. L. (1997). Synthesis  
963 of mannose-(inositol-P)<sub>2</sub>-ceramide, the major sphingolipid in *Saccharomyces*  
964 *cerevisiae*, requires the IPT1 (YDR072c) gene. *J Biol Chem*, 272(47), 29620-29625.  
965 doi:10.1074/jbc.272.47.29620
- 966 Dietrich, C., Bagatolli, L. A., Volovyk, Z. N., Thompson, N. L., Levi, M., Jacobson, K., &  
967 Gratton, E. (2001). Lipid rafts reconstituted in model membranes. *Biophys J*, 80(3),  
968 1417-1428. doi:10.1016/s0006-3495(01)76114-0
- 969 Dodge, J. T., & Phillips, G. B. (1967). Composition of phospholipids and of phospholipid  
970 fatty acids and aldehydes in human red cells. *J Lipid Res*, 8(6), 667-675.
- 971 Douglas, L. M., & Konopka, J. B. (2014). Fungal membrane organization: the eisosome  
972 concept. *Annu Rev Microbiol*, 68, 377-393. doi:10.1146/annurev-micro-091313-  
973 103507
- 974 Ejsing, C. S., Sampaio, J. L., Surendranath, V., Duchoslav, E., Ekroos, K., Klemm, R. W., . . .  
975 Shevchenko, A. (2009). Global analysis of the yeast lipidome by quantitative shotgun  
976 mass spectrometry. *Proc Natl Acad Sci U S A*, 106(7), 2136-2141.  
977 doi:10.1073/pnas.0811700106
- 978 Elble, R. (1992). A simple and efficient procedure for transformation of yeasts.  
979 *Biotechniques*, 13(1), 18-20.
- 980 Elson, E. L., Fried, E., Dolbow, J. E., & Genin, G. M. (2010). Phase separation in biological  
981 membranes: integration of theory and experiment. *Annu Rev Biophys*, 39, 207-226.  
982 doi:10.1146/annurev.biophys.093008.131238
- 983 Engberg, O., Hautala, V., Yasuda, T., Dehio, H., Murata, M., Slotte, J. P., & Nyholm, T. K.  
984 M. (2016). The Affinity of Cholesterol for Different Phospholipids Affects Lateral  
985 Segregation in Bilayers. *Biophys J*, 111(3), 546-556. doi:10.1016/j.bpj.2016.06.036
- 986 Fairn, G. D., Hermansson, M., Somerharju, P., & Grinstein, S. (2011). Phosphatidylserine is

- 987 polarized and required for proper Cdc42 localization and for development of cell  
988 polarity. *Nat Cell Biol*, 13(12), 1424-1430. doi:10.1038/ncb2351
- 989 Fischer, M. A., Temmerman, K., Ercan, E., Nickel, W., & Seedorf, M. (2009). Binding of  
990 plasma membrane lipids recruits the yeast integral membrane protein Ist2 to the  
991 cortical ER. *Traffic*, 10(8), 1084-1097. doi:10.1111/j.1600-0854.2009.00926.x
- 992 Fujita, A., Cheng, J., & Fujimoto, T. (2010). Quantitative electron microscopy for the  
993 nanoscale analysis of membrane lipid distribution. *Nat Protoc*, 5(4), 661-669.  
994 doi:10.1038/nprot.2010.20
- 995 Fujita, M., & Kinoshita, T. (2012). GPI-anchor remodeling: potential functions of GPI-  
996 anchors in intracellular trafficking and membrane dynamics. *Biochim Biophys Acta*,  
997 1821(8), 1050-1058. doi:10.1016/j.bbalip.2012.01.004
- 998 Furuta, N., Fujimura-Kamada, K., Saito, K., Yamamoto, T., & Tanaka, K. (2007). Endocytic  
999 recycling in yeast is regulated by putative phospholipid translocases and the  
1000 Ypt31p/32p-Rcy1p pathway. *Mol Biol Cell*, 18(1), 295-312. doi:10.1091/mbc.e06-05-  
1001 0461
- 1002 García-Arribas, A. B., Alonso, A., & Goñi, F. M. (2016). Cholesterol interactions with  
1003 ceramide and sphingomyelin. *Chem Phys Lipids*, 199, 26-34.  
1004 doi:10.1016/j.chemphyslip.2016.04.002
- 1005 Georgiev, A. G., Johansen, J., Ramanathan, V. D., Sere, Y. Y., Beh, C. T., & Menon, A. K.  
1006 (2013). Arv1 regulates PM and ER membrane structure and homeostasis but is  
1007 dispensable for intracellular sterol transport. *Traffic*, 14(8), 912-921.  
1008 doi:10.1111/tra.12082
- 1009 Georgiev, A. G., Sullivan, D. P., Kersting, M. C., Dittman, J. S., Beh, C. T., & Menon, A. K.  
1010 (2011). Osh proteins regulate membrane sterol organization but are not required for  
1011 sterol movement between the ER and PM. *Traffic*, 12(10), 1341-1355.

- 1012           doi:10.1111/j.1600-0854.2011.01234.x
- 1013   Giménez-Andrés, M., Čopič, A., & Antony, B. (2018). The Many Faces of Amphipathic  
1014           Helices. *Biomolecules*, 8(3). doi:10.3390/biom8030045
- 1015   Goñi, F. M., & Alonso, A. (2009). Effects of ceramide and other simple sphingolipids on  
1016           membrane lateral structure. *Biochim Biophys Acta*, 1788(1), 169-177.  
1017           doi:10.1016/j.bbamem.2008.09.002
- 1018   Gray, J. V., Petsko, G. A., Johnston, G. C., Ringe, D., Singer, R. A., & Werner-Washburne,  
1019           M. (2004). "Sleeping beauty": quiescence in *Saccharomyces cerevisiae*. *Microbiol*  
1020           *Mol Biol Rev*, 68(2), 187-206. doi:10.1128/membr.68.2.187-206.2004
- 1021   Grossmann, G., Opekarová, M., Malinsky, J., Weig-Meckl, I., & Tanner, W. (2007).  
1022           Membrane potential governs lateral segregation of plasma membrane proteins and  
1023           lipids in yeast. *Embo j*, 26(1), 1-8. doi:10.1038/sj.emboj.7601466
- 1024   Guthrie, C., Fink, GR. (2002). Guide to Yeast Genetics and Molecular Biology, San Diego:  
1025           Academic Press.
- 1026   Haak, D., Gable, K., Beeler, T., & Dunn, T. (1997). Hydroxylation of *Saccharomyces*  
1027           *cerevisiae* ceramides requires Sur2p and Scs7p. *J Biol Chem*, 272(47), 29704-29710.  
1028           doi:10.1074/jbc.272.47.29704
- 1029   Jiang, B., Brown, J. L., Sheraton, J., Fortin, N., & Bussey, H. (1994). A new family of yeast  
1030           genes implicated in ergosterol synthesis is related to the human oxysterol binding  
1031           protein. *Yeast*, 10(3), 341-353. doi:10.1002/yea.320100307
- 1032   Jin, N., Lang, M. J., & Weisman, L. S. (2016). Phosphatidylinositol 3,5-bisphosphate:  
1033           regulation of cellular events in space and time. *Biochem Soc Trans*, 44(1), 177-184.  
1034           doi:10.1042/bst20150174
- 1035   Kaiser, H. J., Lingwood, D., Levental, I., Sampaio, J. L., Kalvodova, L., Rajendran, L., &  
1036           Simons, K. (2009). Order of lipid phases in model and plasma membranes. *Proc Natl*

- 1037 *Acad Sci U S A*, 106(39), 16645-16650. doi:10.1073/pnas.0908987106
- 1038 Kajiwara, K., Watanabe, R., Pichler, H., Ihara, K., Murakami, S., Riezman, H., & Funato, K.  
1039 (2008). Yeast ARV1 is required for efficient delivery of an early GPI intermediate to  
1040 the first mannosyltransferase during GPI assembly and controls lipid flow from the  
1041 endoplasmic reticulum. *Mol Biol Cell*, 19(5), 2069-2082. doi:10.1091/mbc.e07-08-  
1042 0740
- 1043 Kamiński, D. M. (2014). Recent progress in the study of the interactions of amphotericin B  
1044 with cholesterol and ergosterol in lipid environments. *Eur Biophys J*, 43(10-11), 453-  
1045 467. doi:10.1007/s00249-014-0983-8
- 1046 Kato, U., Emoto, K., Fredriksson, C., Nakamura, H., Ohta, A., Kobayashi, T., . . . Umeda, M.  
1047 (2002). A novel membrane protein, Ros3p, is required for phospholipid translocation  
1048 across the plasma membrane in *Saccharomyces cerevisiae*. *J Biol Chem*, 277(40),  
1049 37855-37862. doi:10.1074/jbc.M205564200
- 1050 Klose, C., Ejsing, C. S., García-Sáez, A. J., Kaiser, H. J., Sampaio, J. L., Surma, M. A., . . .  
1051 Simons, K. (2010). Yeast lipids can phase-separate into micrometer-scale membrane  
1052 domains. *J Biol Chem*, 285(39), 30224-30232. doi:10.1074/jbc.M110.123554
- 1053 Klose, C., Surma, M. A., Gerl, M. J., Meyenhofer, F., Shevchenko, A., & Simons, K. (2012).  
1054 Flexibility of a eukaryotic lipidome--insights from yeast lipidomics. *PLoS One*, 7(4),  
1055 e35063. doi:10.1371/journal.pone.0035063
- 1056 Koning, A. J., Roberts, C. J., & Wright, R. L. (1996). Different subcellular localization of  
1057 *Saccharomyces cerevisiae* HMG-CoA reductase isozymes at elevated levels  
1058 corresponds to distinct endoplasmic reticulum membrane proliferations. *Mol Biol Cell*,  
1059 7(5), 769-789. doi:10.1091/mbc.7.5.769
- 1060 Krauss, M., Jia, J. Y., Roux, A., Beck, R., Wieland, F. T., De Camilli, P., & Haucke, V.  
1061 (2008). Arf1-GTP-induced tubule formation suggests a function of Arf family proteins



- 1062 in curvature acquisition at sites of vesicle budding. *J Biol Chem*, 283(41), 27717-
- 1063 27723. doi:10.1074/jbc.M804528200
- 1064 Kusumi, A., Fujiwara, T. K., Chadda, R., Xie, M., Tsunoyama, T. A., Kalay, Z., . . . Suzuki,
- 1065 K. G. (2012). Dynamic organizing principles of the plasma membrane that regulate
- 1066 signal transduction: commemorating the fortieth anniversary of Singer and Nicolson's
- 1067 fluid-mosaic model. *Annu Rev Cell Dev Biol*, 28, 215-250. doi:10.1146/annurev-
- 1068 cellbio-100809-151736
- 1069 Lai, M. H., Bard, M., Pierson, C. A., Alexander, J. F., Goebel, M., Carter, G. T., & Kirsch, D.
- 1070 R. (1994). The identification of a gene family in the *Saccharomyces cerevisiae*
- 1071 ergosterol biosynthesis pathway. *Gene*, 140(1), 41-49. doi:10.1016/0378-
- 1072 1119(94)90728-5
- 1073 Lemmon, M. A., Ferguson, K. M., O'Brien, R., Sigler, P. B., & Schlessinger, J. (1995).
- 1074 Specific and high-affinity binding of inositol phosphates to an isolated pleckstrin
- 1075 homology domain. *Proc Natl Acad Sci U S A*, 92(23), 10472-10476.
- 1076 doi:10.1073/pnas.92.23.10472
- 1077 Levental, I., Byfield, F. J., Chowdhury, P., Gai, F., Baumgart, T., & Janmey, P. A. (2009).
- 1078 Cholesterol-dependent phase separation in cell-derived giant plasma-membrane
- 1079 vesicles. *Biochem J*, 424(2), 163-167. doi:10.1042/bj20091283
- 1080 Lewis, M. J., Nichols, B. J., Prescianotto-Baschong, C., Riezman, H., & Pelham, H. R.
- 1081 (2000). Specific retrieval of the exocytic SNARE Snc1p from early yeast endosomes.
- 1082 *Mol Biol Cell*, 11(1), 23-38. doi:10.1091/mbc.11.1.23
- 1083 Li, B., & Warner, J. R. (1996). Mutation of the Rab6 homologue of *Saccharomyces*
- 1084 *cerevisiae*, YPT6, inhibits both early Golgi function and ribosome biosynthesis. *J Biol*
- 1085 *Chem*, 271(28), 16813-16819. doi:10.1074/jbc.271.28.16813
- 1086 Li, L., & Kaplan, J. (1998). Defects in the yeast high affinity iron transport system result in

- 1087 increased metal sensitivity because of the increased expression of transporters with a  
1088 broad transition metal specificity. *J Biol Chem*, 273(35), 22181-22187.  
1089 doi:10.1074/jbc.273.35.22181
- 1090 Lingwood, D., & Simons, K. (2010). Lipid rafts as a membrane-organizing principle. *Science*,  
1091 327(5961), 46-50. doi:10.1126/science.1174621
- 1092 Longtine, M. S., McKenzie, A., 3rd, Demarini, D. J., Shah, N. G., Wach, A., Brachat, A., . . .  
1093 Pringle, J. R. (1998). Additional modules for versatile and economical PCR-based  
1094 gene deletion and modification in *Saccharomyces cerevisiae*. *Yeast*, 14(10), 953-961.  
1095 doi:10.1002/(sici)1097-0061(199807)14:10<953::aid-yea293>3.0.co;2-u
- 1096 López-Montero, I., Monroy, F., Vélez, M., & Devaux, P. F. (2010). Ceramide: from lateral  
1097 segregation to mechanical stress. *Biochim Biophys Acta*, 1798(7), 1348-1356.  
1098 doi:10.1016/j.bbamem.2009.12.007
- 1099 Maeda, K., Anand, K., Chiapparino, A., Kumar, A., Poletto, M., Kaksonen, M., & Gavin, A.  
1100 C. (2013). Interactome map uncovers phosphatidylserine transport by oxysterol-  
1101 binding proteins. *Nature*, 501(7466), 257-261. doi:10.1038/nature12430
- 1102 Maekawa, M., & Fairn, G. D. (2015). Complementary probes reveal that phosphatidylserine  
1103 is required for the proper transbilayer distribution of cholesterol. *J Cell Sci*, 128(7),  
1104 1422-1433. doi:10.1242/jcs.164715
- 1105 Manneville, J. B., Casella, J. F., Ambroggio, E., Gounon, P., Bertherat, J., Bassereau, P., . . .  
1106 Goud, B. (2008). COPI coat assembly occurs on liquid-disordered domains and the  
1107 associated membrane deformations are limited by membrane tension. *Proc Natl Acad*  
1108 *Sci U S A*, 105(44), 16946-16951. doi:10.1073/pnas.0807102105
- 1109 Manolson, M. F., Proteau, D., Preston, R. A., Stenbit, A., Roberts, B. T., Hoyt, M. A., . . .  
1110 Jones, E. W. (1992). The VPH1 gene encodes a 95-kDa integral membrane  
1111 polypeptide required for in vivo assembly and activity of the yeast vacuolar H(+)-

- 1112 ATPase. *J Biol Chem*, 267(20), 14294-14303.
- 1113 Marshansky, V., Rubinstein, J. L., & Grüber, G. (2014). Eukaryotic V-ATPase: novel  
1114 structural findings and functional insights. *Biochim Biophys Acta*, 1837(6), 857-879.  
1115 doi:10.1016/j.bbabbio.2014.01.018
- 1116 Michell, R. H. (2008). Inositol derivatives: evolution and functions. *Nat Rev Mol Cell Biol*,  
1117 9(2), 151-161. doi:10.1038/nrm2334
- 1118 Middel, V., Zhou, L., Takamiya, M., Beil, T., Shahid, M., Roostalu, U., . . . Strähle, U.  
1119 (2016). Dysferlin-mediated phosphatidylserine sorting engages macrophages in  
1120 sarcolemma repair. *Nat Commun*, 7, 12875. doi:10.1038/ncomms12875
- 1121 Mioka, T., Fujimura-Kamada, K., Mizugaki, N., Kishimoto, T., Sano, T., Nunome, H., . . .  
1122 Tanaka, K. (2018). Phospholipid flippases and Sfk1p, a novel regulator of  
1123 phospholipid asymmetry, contribute to low permeability of the plasma membrane. *Mol*  
1124 *Biol Cell*, 29(10), 1203-1218. doi:10.1091/mbc.E17-04-0217
- 1125 Mizushima, N., Yoshimori, T., & Ohsumi, Y. (2011). The role of Atg proteins in  
1126 autophagosome formation. *Annu Rev Cell Dev Biol*, 27, 107-132.  
1127 doi:10.1146/annurev-cellbio-092910-154005
- 1128 Morvan, J., de Craene, J. O., Rinaldi, B., Addis, V., Misslin, C., & Friant, S. (2015). Btn3  
1129 regulates the endosomal sorting function of the yeast Ent3 epsin, an adaptor for  
1130 SNARE proteins. *J Cell Sci*, 128(4), 706-716. doi:10.1242/jcs.159699
- 1131 Muñoz, M., & Zurzolo, C. (2014). Sorting of GPI-anchored proteins from yeast to mammals--  
1132 common pathways at different sites? *J Cell Sci*, 127(Pt 13), 2793-2801.  
1133 doi:10.1242/jcs.148056
- 1134 Nakanishi, H., de los Santos, P., & Neiman, A. M. (2004). Positive and negative regulation of  
1135 a SNARE protein by control of intracellular localization. *Mol Biol Cell*, 15(4), 1802-  
1136 1815. doi:10.1091/mbc.e03-11-0798

- 1137 Nicolson, G. L. (2014). The Fluid-Mosaic Model of Membrane Structure: still relevant to  
1138 understanding the structure, function and dynamics of biological membranes after  
1139 more than 40 years. *Biochim Biophys Acta*, 1838(6), 1451-1466.  
1140 doi:10.1016/j.bbamem.2013.10.019
- 1141 Nuoffer, C., Jenö, P., Conzelmann, A., & Riezman, H. (1991). Determinants for  
1142 glycopospholipid anchoring of the *Saccharomyces cerevisiae* GAS1 protein to the  
1143 plasma membrane. *Mol Cell Biol*, 11(1), 27-37. doi:10.1128/mcb.11.1.27
- 1144 Nyholm, T. K. M., Jaikishan, S., Engberg, O., Hautala, V., & Slotte, J. P. (2019). The Affinity  
1145 of Sterols for Different Phospholipid Classes and Its Impact on Lateral Segregation.  
1146 *Biophys J*, 116(2), 296-307. doi:10.1016/j.bpj.2018.11.3135
- 1147 Obara, K., Yamamoto, H., & Kihara, A. (2012). Membrane protein Rim21 plays a central role  
1148 in sensing ambient pH in *Saccharomyces cerevisiae*. *J Biol Chem*, 287(46), 38473-  
1149 38481. doi:10.1074/jbc.M112.394205
- 1150 Oh, C. S., Toke, D. A., Mandala, S., & Martin, C. E. (1997). ELO2 and ELO3, homologues of  
1151 the *Saccharomyces cerevisiae* ELO1 gene, function in fatty acid elongation and are  
1152 required for sphingolipid formation. *J Biol Chem*, 272(28), 17376-17384.  
1153 doi:10.1074/jbc.272.28.17376
- 1154 Omnus, D. J., Manford, A. G., Bader, J. M., Emr, S. D., & Stefan, C. J. (2016).  
1155 Phosphoinositide kinase signaling controls ER-PM cross-talk. *Mol Biol Cell*, 27(7),  
1156 1170-1180. doi:10.1091/mbc.E16-01-0002
- 1157 Pan, X., Roberts, P., Chen, Y., Kvam, E., Shulga, N., Huang, K., . . . Goldfarb, D. S. (2000).  
1158 Nucleus-vacuole junctions in *Saccharomyces cerevisiae* are formed through the direct  
1159 interaction of Vac8p with Nvj1p. *Mol Biol Cell*, 11(7), 2445-2457.  
1160 doi:10.1091/mbc.11.7.2445
- 1161 Pittet, M., & Conzelmann, A. (2007). Biosynthesis and function of GPI proteins in the yeast

- 1162            *Saccharomyces cerevisiae*. *Biochim Biophys Acta*, 1771(3), 405-420.
- 1163            doi:10.1016/j.bbalip.2006.05.015
- 1164    Plasencia, I., Norlén, L., & Bagatolli, L. A. (2007). Direct visualization of lipid domains in  
1165            human skin stratum corneum's lipid membranes: effect of pH and temperature.  
1166            *Biophys J*, 93(9), 3142-3155. doi:10.1529/biophysj.106.096164
- 1167    Pomorski, T., Lombardi, R., Riezman, H., Devaux, P. F., van Meer, G., & Holthuis, J. C.  
1168            (2003). Drs2p-related P-type ATPases Dnf1p and Dnf2p are required for phospholipid  
1169            translocation across the yeast plasma membrane and serve a role in endocytosis. *Mol*  
1170            *Biol Cell*, 14(3), 1240-1254. doi:10.1091/mbc.e02-08-0501
- 1171    Popov-Čeleketić, D., Bianchi, F., Ruiz, S. J., Meutiawati, F., & Poolman, B. (2016). A Plasma  
1172            Membrane Association Module in Yeast Amino Acid Transporters. *J Biol Chem*,  
1173            291(31), 16024-16037. doi:10.1074/jbc.M115.706770
- 1174    Quon, E., Sere, Y. Y., Chauhan, N., Johansen, J., Sullivan, D. P., Dittman, J. S., . . . Menon,  
1175            A. K. (2018). Endoplasmic reticulum-plasma membrane contact sites integrate sterol  
1176            and phospholipid regulation. *PLoS Biol*, 16(5), e2003864.  
1177            doi:10.1371/journal.pbio.2003864
- 1178    Risselada, H. J., & Marrink, S. J. (2008). The molecular face of lipid rafts in model  
1179            membranes. *Proc Natl Acad Sci U S A*, 105(45), 17367-17372.  
1180            doi:10.1073/pnas.0807527105
- 1181    Robinson, J. S., Klionsky, D. J., Banta, L. M., & Emr, S. D. (1988). Protein sorting in  
1182            *Saccharomyces cerevisiae*: isolation of mutants defective in the delivery and  
1183            processing of multiple vacuolar hydrolases. *Mol Cell Biol*, 8(11), 4936-4948.  
1184            doi:10.1128/mcb.8.11.4936
- 1185    Rosenwald, A. G., Rhodes, M. A., Van Valkenburgh, H., Palanivel, V., Chapman, G., Boman,  
1186            A., . . . Kahn, R. A. (2002). ARL1 and membrane traffic in *Saccharomyces cerevisiae*.

- 1187 *Yeast*, 19(12), 1039-1056. doi:10.1002/yea.897
- 1188 Rothman, J. H., Howald, I., & Stevens, T. H. (1989). Characterization of genes required for  
1189 protein sorting and vacuolar function in the yeast *Saccharomyces cerevisiae*. *Embo j*,  
1190 8(7), 2057-2065.
- 1191 Rouser, G., Fkeischer, S., & Yamamoto, A. (1970). Two dimensional then layer  
1192 chromatographic separation of polar lipids and determination of phospholipids by  
1193 phosphorus analysis of spots. *Lipids*, 5(5), 494-496. doi:10.1007/bf02531316
- 1194 Roy, A., & Levine, T. P. (2004). Multiple pools of phosphatidylinositol 4-phosphate detected  
1195 using the pleckstrin homology domain of Osh2p. *J Biol Chem*, 279(43), 44683-44689.  
1196 doi:10.1074/jbc.M401583200
- 1197 Saheki, Y., & De Camilli, P. (2017). Endoplasmic Reticulum-Plasma Membrane Contact  
1198 Sites. *Annu Rev Biochem*, 86, 659-684. doi:10.1146/annurev-biochem-061516-044932
- 1199 Saito, K., Fujimura-Kamada, K., Furuta, N., Kato, U., Umeda, M., & Tanaka, K. (2004).  
1200 Cdc50p, a protein required for polarized growth, associates with the Drs2p P-type  
1201 ATPase implicated in phospholipid translocation in *Saccharomyces cerevisiae*. *Mol*  
1202 *Biol Cell*, 15(7), 3418-3432. doi:10.1091/mbc.e03-11-0829
- 1203 Sakane, H., Yamamoto, T., & Tanaka, K. (2006). The functional relationship between the  
1204 Cdc50p-Drs2p putative aminophospholipid translocase and the Arf GAP Gcs1p in  
1205 vesicle formation in the retrieval pathway from yeast early endosomes to the TGN.  
1206 *Cell Struct Funct*, 31(2), 87-108. doi:10.1247/csf.06021
- 1207 Sambrook, J., Russell, DW. (2001). *Molecular Cloning: A Laboratory Manual*, Cold Spring  
1208 Harbor, NY: Cold Spring Harbor Laboratory Press.
- 1209 Schmidt, O., & Teis, D. (2012). The ESCRT machinery. *Curr Biol*, 22(4), R116-120.  
1210 doi:10.1016/j.cub.2012.01.028
- 1211 Schneider, R., Brügger, B., Sandhoff, R., Zellnig, G., Leber, A., Lampl, M., . . . Kohlwein, S.

- 1212 D. (1999). Electrospray ionization tandem mass spectrometry (ESI-MS/MS) analysis  
1213 of the lipid molecular species composition of yeast subcellular membranes reveals  
1214 acyl chain-based sorting/remodeling of distinct molecular species en route to the  
1215 plasma membrane. *J Cell Biol*, 146(4), 741-754. doi:10.1083/jcb.146.4.741
- 1216 Schulz, T. A., & Creutz, C. E. (2004). The tricalbin C2 domains: lipid-binding properties of a  
1217 novel, synaptotagmin-like yeast protein family. *Biochemistry*, 43(13), 3987-3995.  
1218 doi:10.1021/bi036082w
- 1219 Schäfer, L. V., de Jong, D. H., Holt, A., Rzepiela, A. J., de Vries, A. H., Poolman, B., . . .  
1220 Marrink, S. J. (2011). Lipid packing drives the segregation of transmembrane helices  
1221 into disordered lipid domains in model membranes. *Proc Natl Acad Sci U S A*, 108(4),  
1222 1343-1348. doi:10.1073/pnas.1009362108
- 1223 Sengupta, P., Hammond, A., Holowka, D., & Baird, B. (2008). Structural determinants for  
1224 partitioning of lipids and proteins between coexisting fluid phases in giant plasma  
1225 membrane vesicles. *Biochim Biophys Acta*, 1778(1), 20-32.  
1226 doi:10.1016/j.bbamem.2007.08.028
- 1227 Serrano, R., Kielland-Brandt, M. C., & Fink, G. R. (1986). Yeast plasma membrane ATPase  
1228 is essential for growth and has homology with (Na<sup>+</sup> + K<sup>+</sup>), K<sup>+</sup>- and Ca<sup>2+</sup>-ATPases.  
1229 *Nature*, 319(6055), 689-693. doi:10.1038/319689a0
- 1230 Sharma, P., Varma, R., Sarasij, R. C., Ira, Gousset, K., Krishnamoorthy, G., . . . Mayor, S.  
1231 (2004). Nanoscale organization of multiple GPI-anchored proteins in living cell  
1232 membranes. *Cell*, 116(4), 577-589. doi:10.1016/s0092-8674(04)00167-9
- 1233 Silve, S., Dupuy, P. H., Labit-Lebouteiller, C., Kaghad, M., Chalon, P., Rahier, A., . . .  
1234 Loison, G. (1996). Emopamil-binding protein, a mammalian protein that binds a series  
1235 of structurally diverse neuroprotective agents, exhibits delta8-delta7 sterol isomerase  
1236 activity in yeast. *J Biol Chem*, 271(37), 22434-22440. doi:10.1074/jbc.271.37.22434



- 1237 Singer, S. J., & Nicolson, G. L. (1972). The fluid mosaic model of the structure of cell  
1238 membranes. *Science*, *175*(4023), 720-731. doi:10.1126/science.175.4023.720
- 1239 Solanko, L. M., Sullivan, D. P., Sere, Y. Y., Szomek, M., Lunding, A., Solanko, K. A., . . .  
1240 Wüstner, D. (2018). Ergosterol is mainly located in the cytoplasmic leaflet of the yeast  
1241 plasma membrane. *Traffic*, *19*(3), 198-214. doi:10.1111/tra.12545
- 1242 Sychrová, H., Ramírez, J., & Peña, A. (1999). Involvement of Nha1 antiporter in regulation of  
1243 intracellular pH in *Saccharomyces cerevisiae*. *FEMS Microbiol Lett*, *171*(2), 167-172.  
1244 doi:10.1111/j.1574-6968.1999.tb13428.x
- 1245 Toulmay, A., & Prinz, W. A. (2013). Direct imaging reveals stable, micrometer-scale lipid  
1246 domains that segregate proteins in live cells. *J Cell Biol*, *202*(1), 35-44.  
1247 doi:10.1083/jcb.201301039
- 1248 Trimble, W. S., & Grinstein, S. (2015). Barriers to the free diffusion of proteins and lipids in  
1249 the plasma membrane. *J Cell Biol*, *208*(3), 259-271. doi:10.1083/jcb.201410071
- 1250 Tsuchiya, M., Hara, Y., Okuda, M., Itoh, K., Nishioka, R., Shiomi, A., . . . Umeda, M. (2018).  
1251 Cell surface flip-flop of phosphatidylserine is critical for PIEZO1-mediated myotube  
1252 formation. *Nat Commun*, *9*(1), 2049. doi:10.1038/s41467-018-04436-w
- 1253 Tsuji, T., Fujimoto, M., Tatematsu, T., Cheng, J., Orii, M., Takatori, S., & Fujimoto, T.  
1254 (2017). Niemann-Pick type C proteins promote microautophagy by expanding raft-like  
1255 membrane domains in the yeast vacuole. *Elife*, *6*. doi:10.7554/eLife.25960
- 1256 Uchida, Y., Hasegawa, J., Chinnapen, D., Inoue, T., Okazaki, S., Kato, R., . . . Arai, H.  
1257 (2011). Intracellular phosphatidylserine is essential for retrograde membrane traffic  
1258 through endosomes. *Proc Natl Acad Sci U S A*, *108*(38), 15846-15851.  
1259 doi:10.1073/pnas.1109101108
- 1260 van Leeuwen, J., Pons, C., Mellor, J. C., Yamaguchi, T. N., Friesen, H., Koschwanez, J., . . .  
1261 Boone, C. (2016). Exploring genetic suppression interactions on a global scale.

- 1262 *Science*, 354(6312). doi:10.1126/science.aag0839
- 1263 Vater, C. A., Raymond, C. K., Ekena, K., Howald-Stevenson, I., & Stevens, T. H. (1992). The  
1264 VPS1 protein, a homolog of dynamin required for vacuolar protein sorting in  
1265 *Saccharomyces cerevisiae*, is a GTPase with two functionally separable domains. *J*  
1266 *Cell Biol*, 119(4), 773-786. doi:10.1083/jcb.119.4.773
- 1267 Veatch, S. L., & Keller, S. L. (2003). Separation of liquid phases in giant vesicles of ternary  
1268 mixtures of phospholipids and cholesterol. *Biophys J*, 85(5), 3074-3083.  
1269 doi:10.1016/s0006-3495(03)74726-2
- 1270 Wang, C. W., Miao, Y. H., & Chang, Y. S. (2014). A sterol-enriched vacuolar microdomain  
1271 mediates stationary phase lipophagy in budding yeast. *J Cell Biol*, 206(3), 357-366.  
1272 doi:10.1083/jcb.201404115
- 1273 Watt, S. A., Kular, G., Fleming, I. N., Downes, C. P., & Lucocq, J. M. (2002). Subcellular  
1274 localization of phosphatidylinositol 4,5-bisphosphate using the pleckstrin homology  
1275 domain of phospholipase C delta1. *Biochem J*, 363(Pt 3), 657-666. doi:10.1042/0264-  
1276 6021:3630657
- 1277 Wells, G. B., Dickson, R. C., & Lester, R. L. (1998). Heat-induced elevation of ceramide in  
1278 *Saccharomyces cerevisiae* via de novo synthesis. *J Biol Chem*, 273(13), 7235-7243.  
1279 doi:10.1074/jbc.273.13.7235
- 1280 Yamamoto, T., Fujimura-Kamada, K., Shioji, E., Suzuki, R., & Tanaka, K. (2017). Cfs1p, a  
1281 Novel Membrane Protein in the PQ-Loop Family, Is Involved in Phospholipid  
1282 Flippase Functions in Yeast. *G3 (Bethesda)*, 7(1), 179-192.  
1283 doi:10.1534/g3.116.035238
- 1284 Yeung, B. G., Phan, H. L., & Payne, G. S. (1999). Adaptor complex-independent clathrin  
1285 function in yeast. *Mol Biol Cell*, 10(11), 3643-3659. doi:10.1091/mbc.10.11.3643
- 1286 Yeung, T., Gilbert, G. E., Shi, J., Silvius, J., Kapus, A., & Grinstein, S. (2008). Membrane

- 1287            phosphatidylserine regulates surface charge and protein localization. *Science*,  
1288            319(5860), 210-213. doi:10.1126/science.1152066
- 1289    Young, B. P., Shin, J. J., Orij, R., Chao, J. T., Li, S. C., Guan, X. L., . . . Loewen, C. J. (2010).  
1290            Phosphatidic acid is a pH biosensor that links membrane biogenesis to metabolism.  
1291            *Science*, 329(5995), 1085-1088. doi:10.1126/science.1191026
